# Supplementary material for: Characterization of novel Bovine Leukemia Virus (BLV) antisense transcripts by deep sequencing reveals constitutive expression in tumors and transcriptional interaction with viral microRNAs
Source: Retrovirology. 2016 May 3;13:33. doi: 10.1186/s12977-016-0267-8 (PMC4855707; doi:10.1186/s12977-016-0267-8)
Supplement: Supplementary file 1 — 10.1186/s12977-016-0267-8 RT-PCR in bovine and ovine tumors. Figure S2. Eighteen 3’RACE libraries mapped to the BLV genome. Figure S3. BLV AS1 potential open reading frame. Figure S4. Knock down of AS1 with locked nucleic acids. Figure S5. Continued antisense transcription in the defective provirus T1345. Table S1. RNA sequencing results. Table S2. Output of Coding Potential Assessment Tool (CPAT). Table S3. Sequence conservation of BLV AS1 and Tax sequences. Table S4. Oligonucleotides used. Text S1. Extended materials and methods. [file 12977_2016_267_MOESM1_ESM.pdf]

**Figure S1**

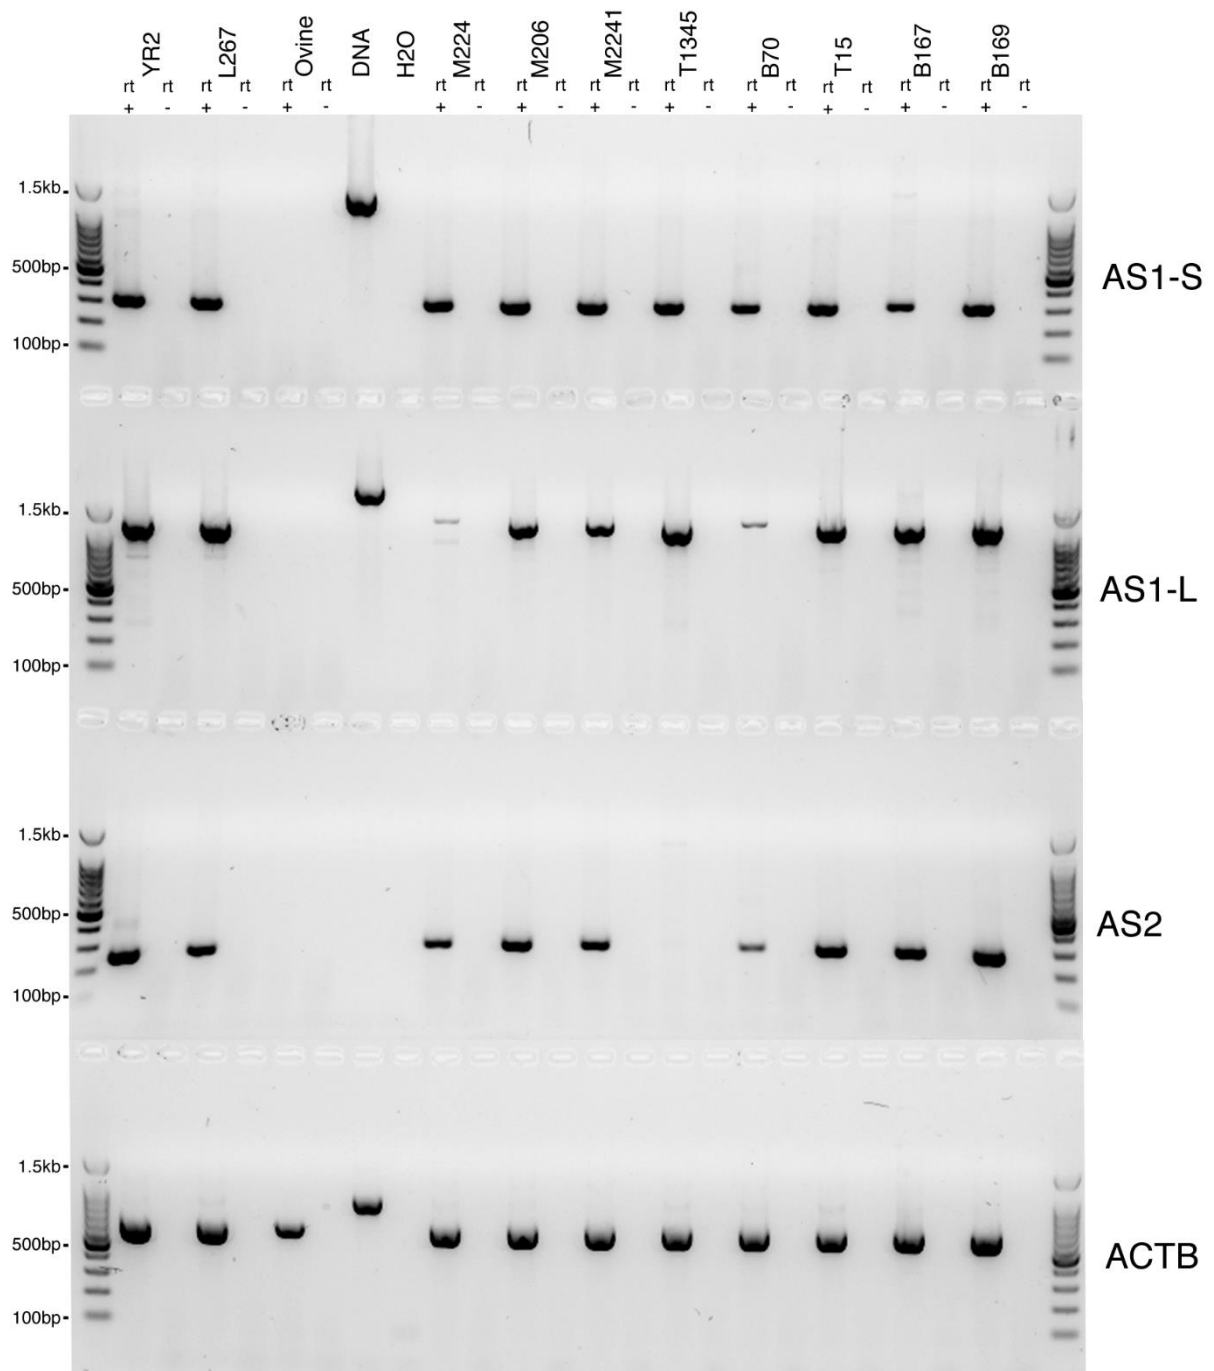

**Figure S1 RT-PCR in bovine and ovine tumors.** Extended version of Figure 1 B showing RT-PCR results for three ovine (M224, M206, M2241) and five bovine (T1345, B70, T15, B167, B169) tumors. The lack of amplification in T1345 for AS2 is expected as this tumor carries a provirus with a large internal deletion that removes the second exon of AS2 (See Figure S5). (Rt+ reverse transcriptase positive, Rt- reverse transcriptase negative).

Figure S2

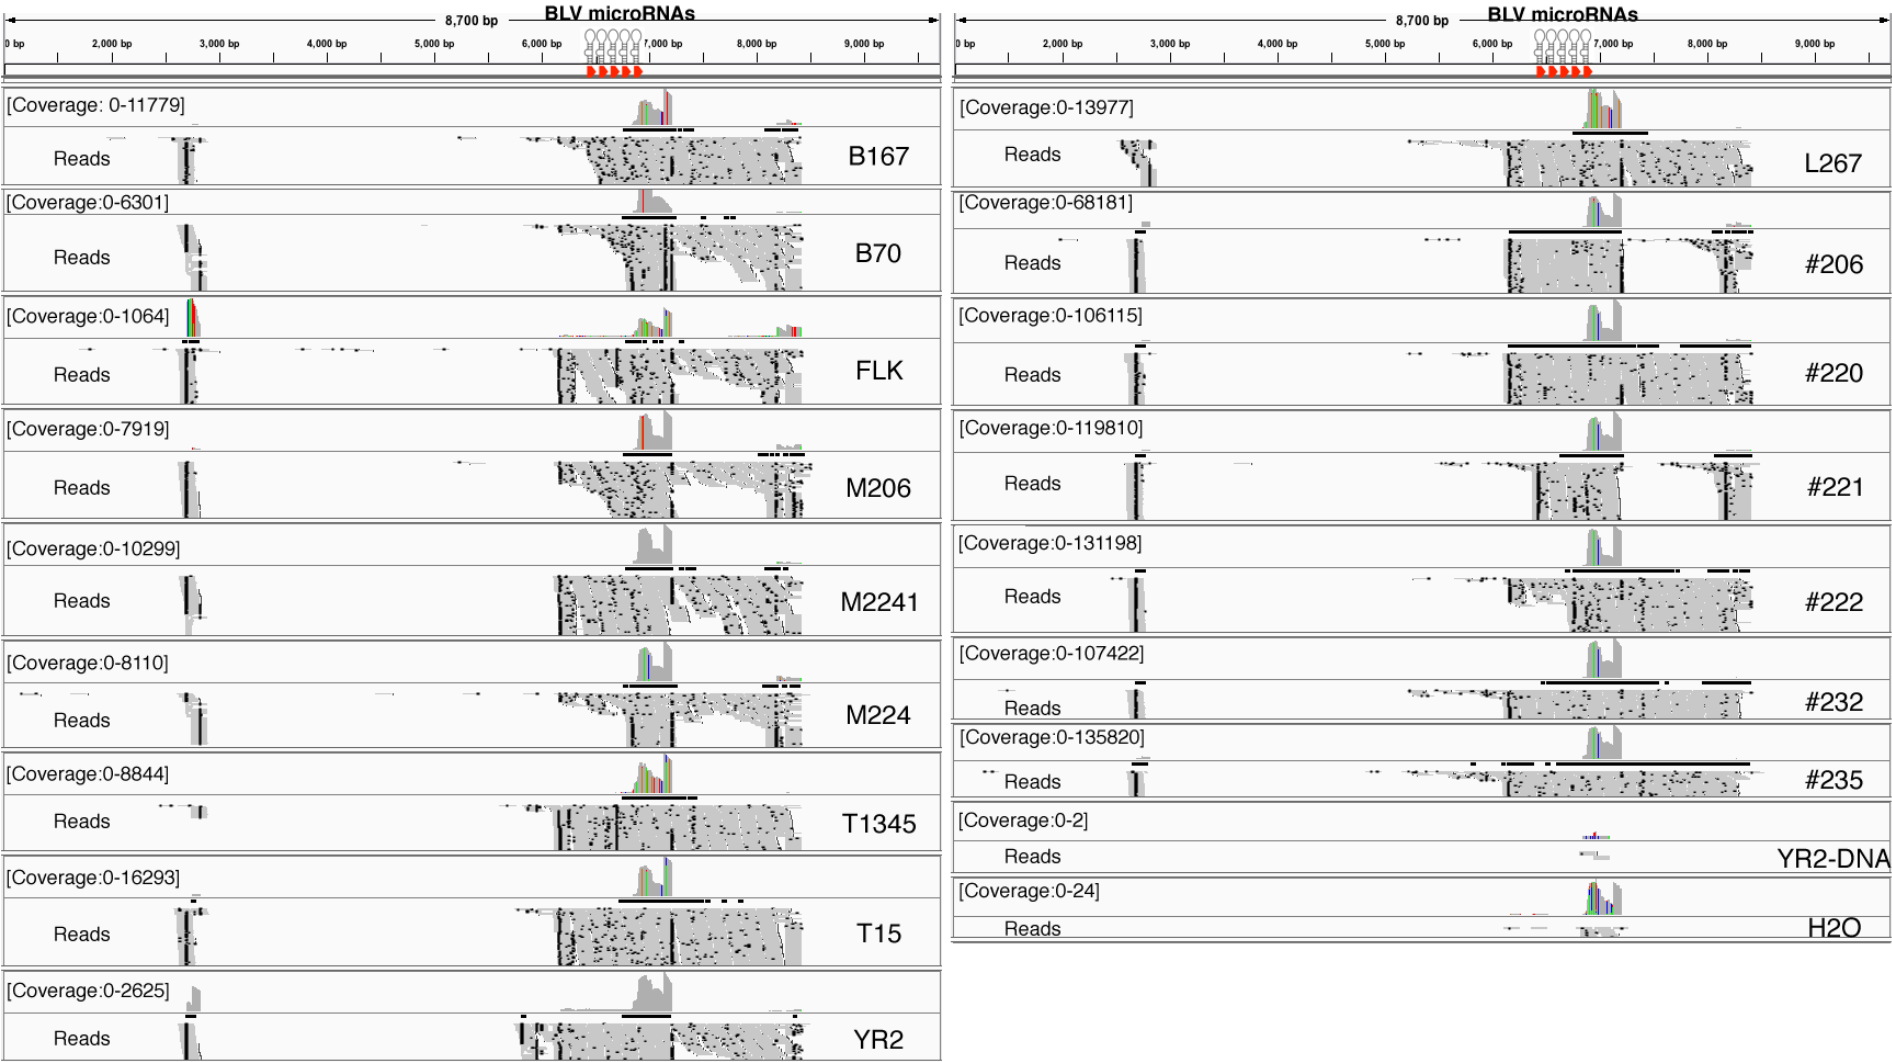

**Figure S2 Eighteen 3'RACE libraries mapped to the BLV genome.** Screen shot from the Integrative Genomics Viewer (IGV) with the position of the BLV microRNAs indicated, showing reads mapping to the BLV genome for cell lines YR2, L267, FLK, three ovine tumors, four bovine tumors and PBMCs isolated at 17 months post-inoculation from 6 asymptomatic BLV infected sheep. In each library, coverage is concentrated immediately following the BLV microRNA region marking the 3' end of AS1-S. A smaller fraction of reads extend beyond the BLV microRNA region (AS1-L) or are spliced further upstream (AS2). As a negative control, libraries were prepared using YR2 DNA and H2O as template. In both of these libraries a small number of reads were observed, due to either cross contamination between samples during the library preparation or inaccurate demultiplexing. In the case of both negative control libraries, the coverage was orders or magnitude lower than that seen in the BLV positive libraries.

Figure S3

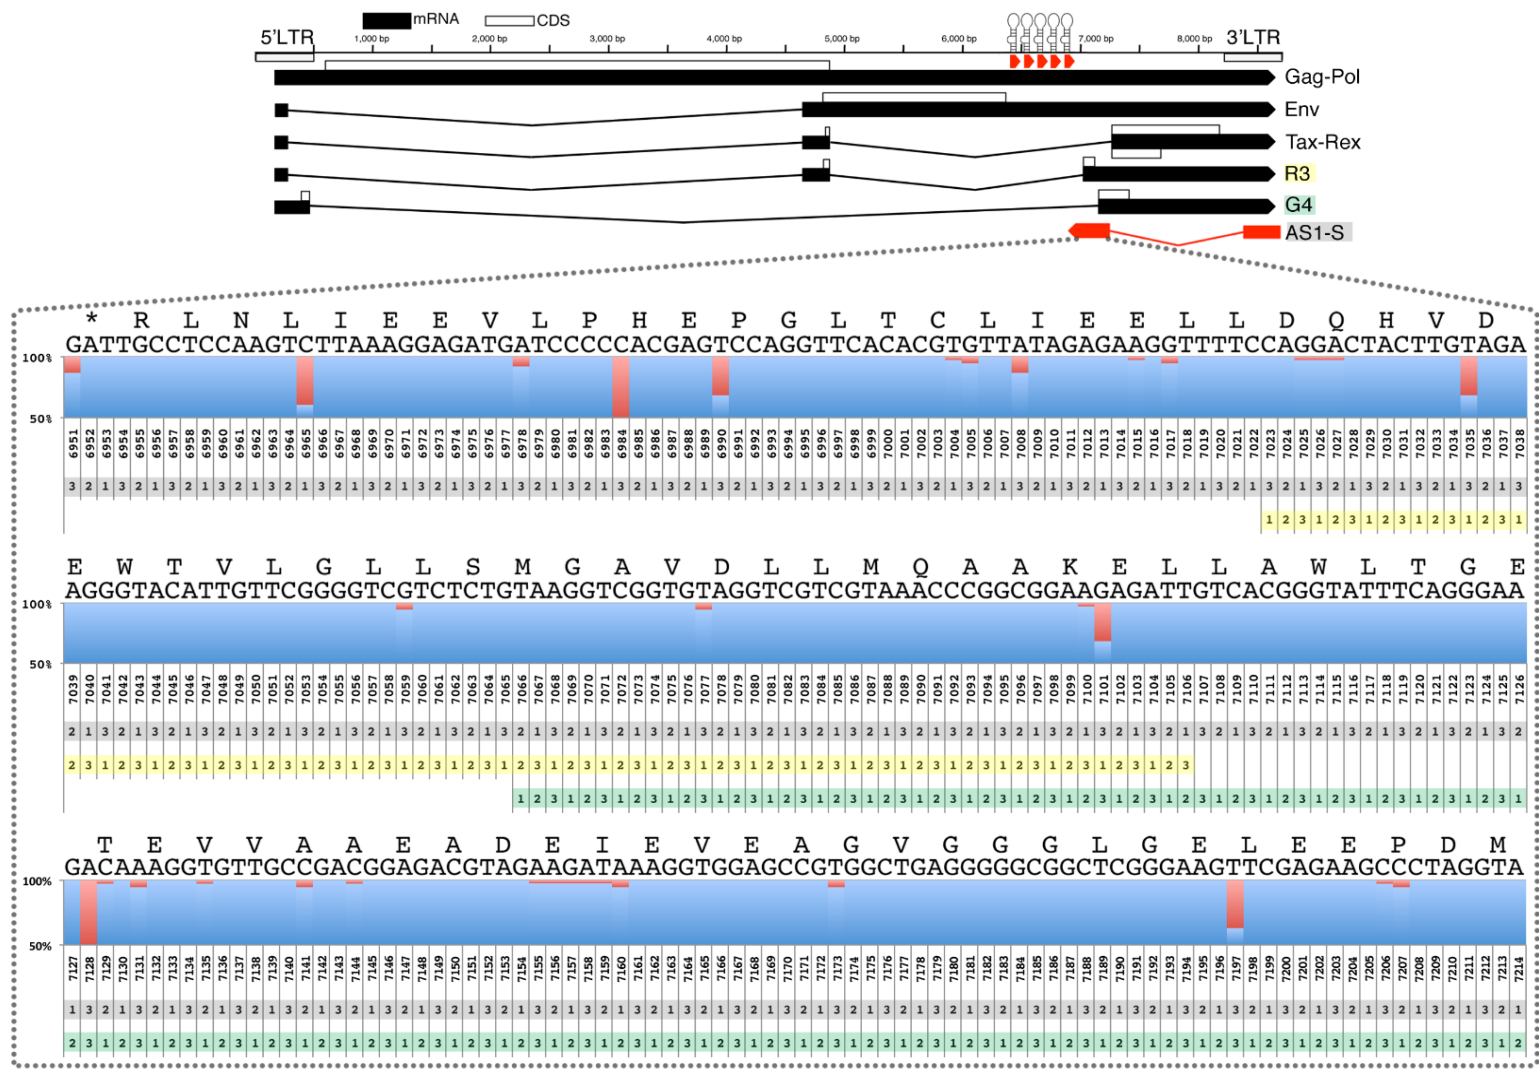

**Figure S3 BLV AS1 potential open reading frame.** Potential amino acid sequence and the underlying nucleotide sequence. Shown below is the percentage conservation for each base calculated using the consensus sequence of the ovine and bovine tumors sequenced by us, as well as six BLV genomes available in NCBI. The amount of red at each position indicates the degree that a particular base varies in the samples examined. Below each base is indicated whether it corresponds to the 1<sup>st</sup>, 2<sup>nd</sup> or 3<sup>rd</sup> position of the relevant ORF. Shown ORFs include the potential AS1 ORF (grey), the sense R3 (yellow) and G4 (green) ORFs.

**Figure S4**

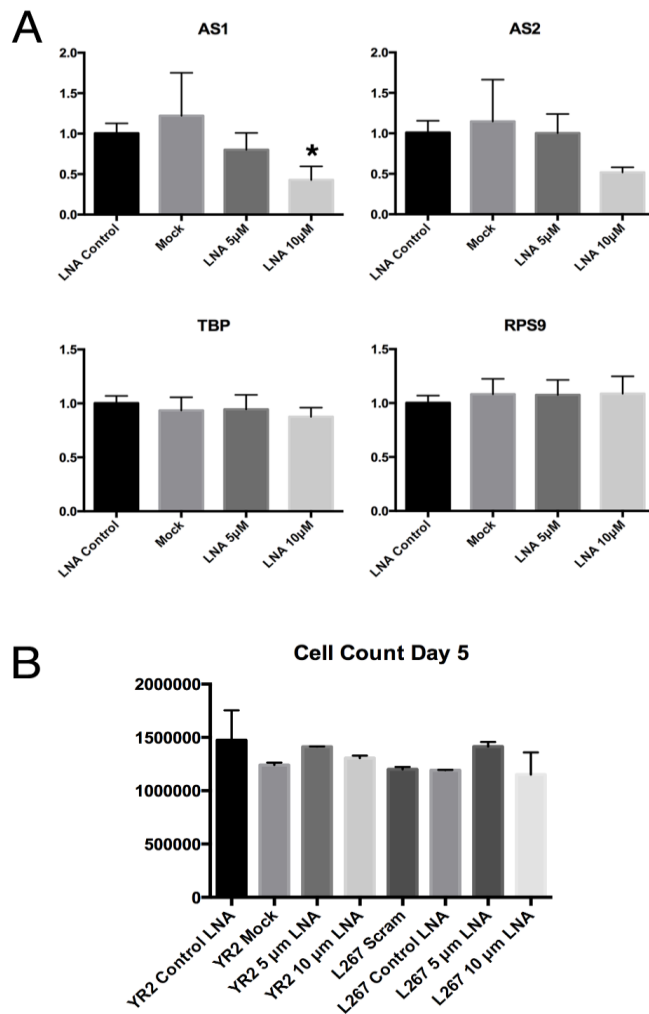

**Figure S4 Knock down of AS1 with locked nucleic acids.** (A) Three locked nucleic acids (LNAs) designed to target the common first exon of AS1/2, the AS1 splice junction and the second exon of AS1 were mixed and introduced via unassisted uptake at 5  $\mu$ M and 10  $\mu$ M concentrations, in duplicate to the YR2 and L267 BLV cell lines. Scrambled LNAs at a concentration of 10  $\mu$ M and a mock treatment were also carried out. Following 5 days of incubation, RNA was extracted and real time PCR carried out with assays for AS1, AS2, Tax and the house keeping genes RSP9 and TBP. Fold changes observed were scaled to the LNA control samples, which were set to 1. The Kruskal-Wallis test showed a significant difference between the treatments in AS1 (p-value = 0.0192), with Dunn's multiple comparisons test showing a significant difference in LNA Control vs. LNA 10 $\mu$ M (adjusted \*p-value < 0.05). For AS2 the Kruskal-Wallis test showed a significant difference between the groups, but Dunn's multiple comparisons test did not show any significance between the individual treatments. Tax expression was not detected in the treated or control YR2 and L267 cells and was not graphed.

(Values are means  $\pm$  SD combined for YR2 and L267). (B) Following five days of incubation there was no obvious difference in the cell count among the different treatment conditions for both cell lines (data presented are average values and error bar shows the maximum cell count).

**Figure S5**

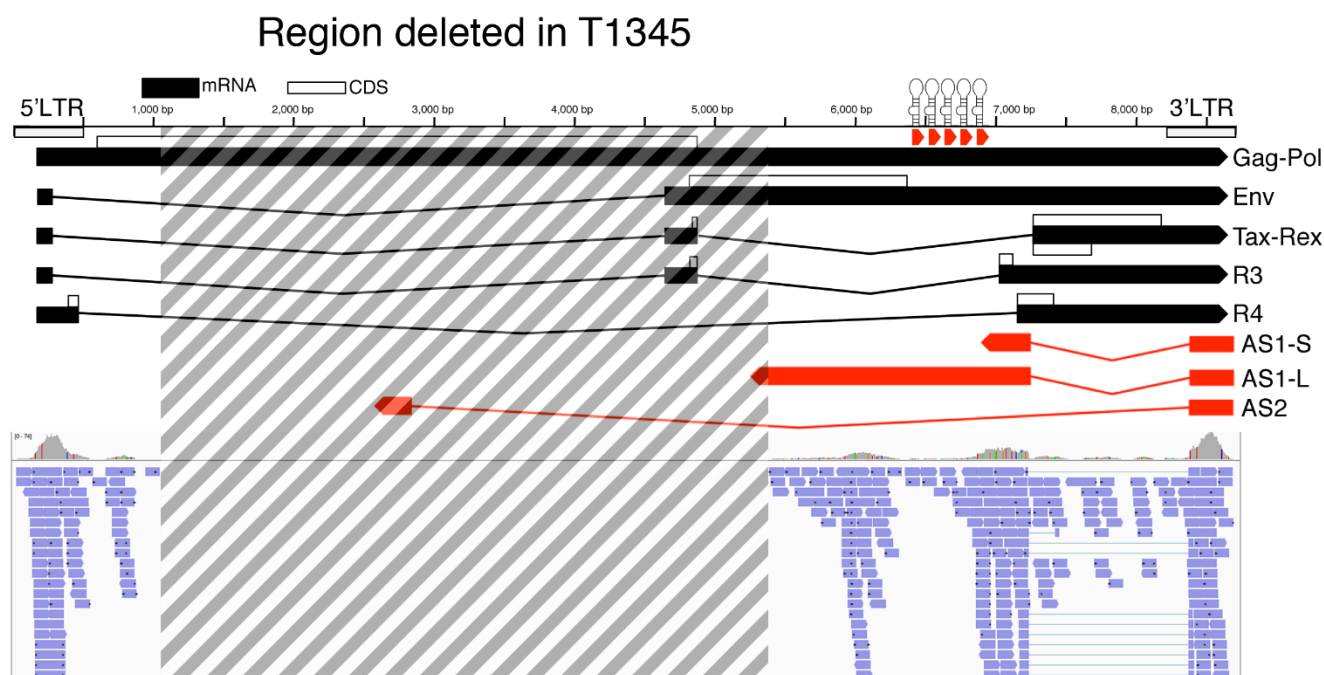

**Figure S5 Continued antisense transcription in the defective provirus T1345.** Ideogram showing the 4.4kb region deleted (dashed lines) in the T1345 provirus, identified in a monoclonal bovine tumor originating from a natural infection. Despite the deletion and the removal of the potential PAS for AS1-L, antisense transcription remains robust.

**Table S1 RNA sequencing results (CPM = counts per million reads)**

| BLV cell lines | Antisense reads | Sense reads | Uniquely mapped reads | Antisense CPM | Sense CPM | AS CPM / S CPM |
|----------------|-----------------|-------------|-----------------------|---------------|-----------|----------------|
| L267           | 732             | 49          | 98989055              | 7.4           | 0.5       | 14.9           |
| YR2            | 526             | 9           | 54121243              | 9.7           | 0.2       | 58.4           |

| BLV cell lines Constitutive Tax expressing | Antisense reads | Sense reads* | Uniquely mapped reads | Antisense CPM | Sense CPM* | AS CPM / S CPM* |
|--------------------------------------------|-----------------|--------------|-----------------------|---------------|------------|-----------------|
| L267_TaxSN                                 | 149             | 40918        | 40848268              | 4             | 1002       | 0               |
| YR2_TaxSN                                  | 766             | 2126142      | 26093199              | 29            | 81483      | 0               |

\*As these cells have been transduced with a lentiviral vector containing the BLV Tax gene, the sense read count will be somewhat artificially elevated.

| Ovine Tumors | Antisense reads | Sense reads | Uniquely mapped reads | Antisense CPM | Sense CPM | AS CPM / S CPM |
|--------------|-----------------|-------------|-----------------------|---------------|-----------|----------------|
| M107         | 149             | 1           | 49133967              | 3             | 0         | 149            |
| M108         | 10176           | 96          | 89870131              | 113           | 1         | 106            |
| M126         | 416             | 0           | 54523313              | 8             | 0         | na             |
| M138         | 9734            | 113         | 78184059              | 125           | 1         | 86             |
| M155         | 4922            | 124         | 47933750              | 103           | 3         | 40             |
| M160         | 303             | 1           | 26665476              | 11            | 0         | 303            |
| M161         | 27              | 1           | 60630935              | 0             | 0         | 27             |
| M206         | 323             | 69          | 72283867              | 4             | 1         | 5              |
| M20PS        | 134             | 0           | 64457064              | 2             | 0         | na             |
| M210         | 531             | 152         | 98718132              | 5             | 2         | 3              |
| M21PS        | 261             | 0           | 88207690              | 3             | 0         | na             |
| M2233        | 10826           | 1894        | 98091530              | 110           | 19        | 6              |
| M2241        | 333             | 96          | 116416582             | 3             | 1         | 3              |
| M224         | 200             | 52          | 123827745             | 2             | 0         | 4              |
| M2311RM      | 51              | 1           | 18352207              | 3             | 0         | 51             |
| M251         | 476             | 2           | 57534668              | 8             | 0         | 238            |
| M2531T       | 77              | 23          | 22379496              | 3             | 1         | 3              |
| M2532PS      | 90              | 43          | 27152057              | 3             | 2         | 2              |
| M28PS        | 153             | 2           | 27420479              | 6             | 0         | 77             |
| M31Leu       | 134             | 49          | 44855981              | 3             | 1         | 3              |
| M32Leu       | 154             | 34          | 43549560              | 4             | 1         | 5              |
| M33Leu       | 80              | 177         | 27828214              | 3             | 6         | 0              |
| M344t0       | 113             | 6           | 26399373              | 4             | 0         | 19             |
| M360         | 95              | 11          | 31508541              | 3             | 0         | 9              |
| M395t0       | 118             | 14          | 25704049              | 5             | 1         | 8              |
| M41Leu       | 248             | 99          | 59025661              | 4             | 2         | 3              |
| M51          | 145             | 26          | 43602381              | 3             | 1         | 6              |
| M5578        | 154             | 1           | 56526611              | 3             | 0         | 154            |

| Bovine Tumors | Antisense reads | Sense reads | Uniquely mapped reads | Antisense CPM | Sense CPM | AS CPM / S CPM |
|---------------|-----------------|-------------|-----------------------|---------------|-----------|----------------|
| B167          | 466             | 104         | 58806726              | 7.9           | 1.8       | 4.5            |
| B169          | 372             | 13          | 45113265              | 8.2           | 0.3       | 28.6           |
| B3171         | 358             | 7           | 66728945              | 5.4           | 0.1       | 51.1           |
| B3191         | 736             | 14          | 66654840              | 11.0          | 0.2       | 52.6           |
| B3198         | 212             | 104         | 57163314              | 3.7           | 1.8       | 2.0            |
| B3261         | 270             | 315         | 27374722              | 9.9           | 11.5      | 0.9            |
| B70           | 27              | 0           | 45802524              | 0.6           | 0.0       | na             |
| B76SUS        | 84              | 1           | 81850287              | 1.0           | 0.0       | 84.0           |
| LB120         | 94              | 4           | 43108562              | 2.2           | 0.1       | 23.5           |
| T1345         | 171             | 60          | 37133243              | 4.6           | 1.6       | 2.9            |
| T15           | 171             | 60          | 37133243              | 4.6           | 1.6       | 2.9            |
| B1351         | 775             | 1222        | 147025250             | 5.3           | 8.3       | 0.6            |

| Bovine negative control | Antisense reads | Sense reads | Uniquely mapped reads | Antisense CPM | Sense CPM | AS CPM / S CPM |
|-------------------------|-----------------|-------------|-----------------------|---------------|-----------|----------------|
| B78t0                   | 0               | 0           | 64282590              | 0.0           | 0.0       | na             |

| Asymptomatic ovine samples | Antisense reads | Sense reads | Uniquely mapped reads | Antisense CPM | Sense CPM | AS CPM / S CPM | Proviral Load | Number of clones | Largest clone % of reads |
|----------------------------|-----------------|-------------|-----------------------|---------------|-----------|----------------|---------------|------------------|--------------------------|
| #206                       | 31              | 5           | 50636602              | 0.6           | 0.1       | 6.2            | 5.3           | 1044             | 4%                       |
| #220                       | 32              | 14          | 39135557              | 0.8           | 0.4       | 2.3            | 6.4           | 810              | 5%                       |
| #221                       | 76              | 16          | 41934579              | 1.8           | 0.4       | 4.8            | 15.5          | 2118             | 1%                       |
| #222                       | 34              | 8           | 38819095              | 0.9           | 0.2       | 4.3            | 7.4           | 1522             | 1%                       |
| #232                       | 64              | 10          | 40063428              | 1.6           | 0.2       | 6.4            | 11.2          | 1368             | 4%                       |
| #235                       | 354             | 24          | 58371371              | 6.1           | 0.4       | 14.8           | 40.6          | 446              | 87%                      |

**Table S1 continued**

BLV microRNA levels in three asymptomatic ovine samples

|              | #206  |          | #220   |          | #232   |          | Average CPM     |
|--------------|-------|----------|--------|----------|--------|----------|-----------------|
|              | Reads | CPM      | Reads  | CPM      | Reads  | CPM      |                 |
| BLV-miR-1-3p | 155   | 79.31    | 39998  | 2859.1   | 24854  | 1926.96  | <b>1621.79</b>  |
| BLV-miR-1-5p | 68    | 34.79    | 902    | 64.48    | 691    | 53.57    | <b>50.95</b>    |
| BLV-miR-2-3p | 31    | 15.86    | 10598  | 757.56   | 3834   | 297.25   | <b>356.89</b>   |
| BLV-miR-2-5p | 4544  | 2325.08  | 246282 | 17604.51 | 107735 | 8352.81  | <b>9427.47</b>  |
| BLV-miR-3-3p | 267   | 136.62   | 79434  | 5678.03  | 21722  | 1684.13  | <b>2499.59</b>  |
| BLV-miR-3-5p | 1148  | 587.41   | 9333   | 667.13   | 3680   | 285.31   | <b>513.28</b>   |
| BLV-miR-4-3p | 20887 | 10687.49 | 441945 | 31590.73 | 248436 | 19261.52 | <b>20513.25</b> |
| BLV-miR-4-5p | 595   | 304.45   | 9210   | 658.34   | 5739   | 444.95   | <b>469.25</b>   |
| BLV-miR-5-3p | 3848  | 1968.95  | 51727  | 3697.5   | 17401  | 1349.12  | <b>2338.52</b>  |
| BLV-miR-5-5p | 15422 | 7891.15  | 220195 | 15739.79 | 91538  | 7097.04  | <b>10242.66</b> |

**High throughput screening of 5'RACE**

| Start position | AS1 % | AS2 % |
|----------------|-------|-------|
| <u>8661</u>    | 3.33  | 0.00  |
| <u>8659</u>    | 1.13  | 0.00  |
| <u>8657</u>    | 1.53  | 0.00  |
| <u>8656</u>    | 0.51  | 1.80  |
| <u>8655</u>    | 1.42  | 0.74  |
| <u>8653</u>    | 0.00  | 2.21  |
| <u>8650</u>    | 42.26 | 45.88 |
| <u>8649</u>    | 3.29  | 4.36  |
| <u>8645</u>    | 1.95  | 0.00  |
| <u>8640</u>    | 0.00  | 2.39  |
| <u>8638</u>    | 0.62  | 0.00  |
| <u>8626</u>    | 0.64  | 0.00  |
| <u>8622</u>    | 0.01  | 2.03  |
| <u>8621</u>    | 0.67  | 0.00  |
| <u>8614</u>    | 0.52  | 0.00  |
| <u>8598</u>    | 2.23  | 0.00  |
| <u>8593</u>    | 0.90  | 5.98  |
| <u>8591</u>    | 27.35 | 20.76 |
| <u>8590</u>    | 3.68  | 0.00  |
| <u>8588</u>    | 3.69  | 3.65  |
| <u>8586</u>    | 2.58  | 5.98  |
| <u>8578</u>    | 0.88  | 4.24  |
| <u>8563</u>    | 0.80  | 0.00  |

Underlined in the U5 portion of the LTR

Non Underlined in the R portion of the LTR

Percentage of reads in the BLV miRNA region that show evidence of cleave mediated via each miRNA (between the 10 and 11bp of the mature microRNA)

|              | YR2 Total | YR2 nuc | YR2 cyto | #235  |
|--------------|-----------|---------|----------|-------|
| BLV-miR-1-3p | 0         | 0       | 0        | 0     |
| BLV-miR-1-5p | 35.71     | 11.91   | 26.21    | 19.68 |
| BLV-miR-2-3p | 3.38      | 2.00    | 3.97     | 2.33  |
| BLV-miR-2-5p | 7.55      | 1.59    | 8.50     | 0.56  |
| BLV-miR-3-3p | 0.22      | 0.00    | 0.00     | 0.00  |
| BLV-miR-3-5p | 0.00      | 0.00    | 0.00     | 0.00  |
| BLV-miR-4-3p | 0.00      | 0.00    | 0.00     | 0.00  |
| BLV-miR-4-5p | 16.16     | 1.22    | 4.68     | 3.09  |
| BLV-miR-5-3p | 0.23      | 0.03    | 0.02     | 0.00  |
| BLV-miR-5-5p | 2.90      | 0.34    | 10.61    | 0.01  |
| Total %      | 66.14     | 17.08   | 53.99    | 25.67 |

**Table S2 Output of Coding Potential Assessment Tool (CPAT) for Human and Mouse models.**

| Sequence Name | RNA size | ORF size | Ficket Score Human | Hexamer Score Human | Coding Probability Human | Coding Label Human | Ficket Score Mouse | Hexamer Score mouse | Coding Probability Mouse | Coding Label Mouse | Full description                                                                                      |
|---------------|----------|----------|--------------------|---------------------|--------------------------|--------------------|--------------------|---------------------|--------------------------|--------------------|-------------------------------------------------------------------------------------------------------|
| BLV_ENV_CDS   | 1548     | 1548     | 0.4913             | 0.0524733           | 1.000                    | yes                | 0.4913             | 0.054735            | 0.999                    | yes                | AY078387.1 Bovine leukemia virus envelope glycoprotein polyprotein precursor gPr72 mRNA, complete cds |
| BLV_TAX_CDS   | 1323     | 930      | 0.7419             | 0.07244925          | 0.991                    | yes                | 0.7419             | 0.061266            | 0.955                    | yes                | M26772.1 BLVTAP Bovine leukemia virus transactivator protein (XBL-1) mRNA, complete cds               |
| AS1-L_BLV     | 2279     | 264      | 1.2074             | 0.20939568          | 0.449                    | yes                | 1.2074             | 0.18289             | 0.386                    | no                 | YR2 Region included: 5237-7217 & 8353-8650                                                            |
| AS1-S_BLV     | 621      | 264      | 1.2074             | 0.20939568          | 0.474                    | yes                | 1.2074             | 0.18289             | 0.393                    | no                 | YR2 Region included: 6895-7217 & 8353-8650                                                            |
| AS2_BLV       | 475      | 24       | 0.6636             | -0.0202475          | 0.003                    | no                 | 0.6636             | 0.043919            | 0.022                    | no                 | YR2 Region included: 2653-2829 & 8353-8650                                                            |
| HTLV1_TAX_CDS | 1062     | 1062     | 0.6939             | 0.09265053          | 0.998                    | yes                | 0.6939             | 0.0917              | 0.983                    | yes                | AB038239.1 Human T-cell lymphotropic virus type 1 proviral gene for TAX, complete cds                 |
| HBZ-SI        | 1088     | 621      | 0.9541             | 0.3919547           | 0.984                    | yes                | 0.9541             | 0.388948            | 0.919                    | yes                | AB219938.1 Human T-lymphotropic virus 1 HBZ-SI mRNA for bZIP factor splicing isoform, complete cds    |
| HBZ           | 2271     | 621      | 0.9541             | 0.39313014          | 0.983                    | yes                | 0.9541             | 0.39132             | 0.918                    | yes                | DQ273132.1 Human T-lymphotropic virus 1 bZIP factor (HBZ) mRNA, complete cds                          |
| URS0000627204 | 126      | 75       | 0.8738             | 0.05856478          | 0.015                    | no                 | 0.8738             | 0.106084            | 0.060                    | no                 | Bos taurus FMR1 antisense RNA 1 conserved region 2                                                    |
| URS0000629A5A | 74       | 39       | 0.814              | 0.27273758          | 0.035                    | no                 | 0.814              | 0.26024             | 0.071                    | no                 | Bos taurus ST7 overlapping transcript 3 conserved region 1                                            |
| URS000062C20C | 267      | 54       | 0.702              | -0.4533927          | 0.000                    | no                 | 0.702              | -0.40761            | 0.006                    | no                 | Bos taurus Rhabdomyosarcoma 2 associated transcript conserved region 7                                |
| URS000062D38D | 173      | 96       | 0.8215             | -0.1728042          | 0.004                    | no                 | 0.8215             | -0.20799            | 0.021                    | no                 | Bos taurus SMAD5 antisense RNA 1 conserved region 4                                                   |
| URS000062E2FC | 184      | 42       | 1.0161             | 0.39283106          | 0.134                    | no                 | 1.0161             | 0.391101            | 0.159                    | no                 | Bos taurus Pvt1 oncogene conserved region 2                                                           |
| URS00006358D2 | 122      | 0        | 0                  | 0                   | 0.000                    | no                 | 0                  | 0                   | 0.004                    | no                 | Bos taurus WT1 antisense RNA conserved region 6                                                       |
| URS000063C6A6 | 69       | 60       | 1.2062             | 0.31121489          | 0.167                    | no                 | 1.2062             | 0.294404            | 0.181                    | no                 | Bos taurus HOTAIR conserved region 2                                                                  |
| URS000063F560 | 75       | 66       | 1.0881             | 0.31642329          | 0.132                    | no                 | 1.0881             | 0.320309            | 0.167                    | no                 | Bos taurus Six3os1 conserved region 3                                                                 |
| URS0000646539 | 135      | 21       | 0.8415             | -0.4974953          | 0.000                    | no                 | 0.8415             | -0.48419            | 0.005                    | no                 | Bos taurus TTC28 antisense RNA 1 conserved region 2                                                   |
| URS000064CDD2 | 76       | 12       | 0.6466             | -1.2066197          | 0.000                    | no                 | 0.6466             | -1.21027            | 0.000                    | no                 | Bos taurus Ghrelin opposite strand RNA conserved region                                               |
| URS000064D724 | 91       | 0        | 0                  | 0                   | 0.000                    | no                 | 0                  | 0                   | 0.004                    | no                 | Bos taurus SPRY4-IT1 conserved region 1                                                               |
| URS00006510A8 | 128      | 0        | 0                  | 0                   | 0.000                    | no                 | 0                  | 0                   | 0.004                    | no                 | Bos taurus HOX antisense intergenic RNA myeloid 1 conserved region 1                                  |
| URS0000654C49 | 128      | 108      | 1.0217             | -0.1023593          | 0.012                    | no                 | 1.0217             | -0.12115            | 0.045                    | no                 | Bos taurus ZEB2 antisense RNA 1 conserved region 1                                                    |
| URS0000656B63 | 196      | 66       | 0.9235             | -0.4407478          | 0.001                    | no                 | 0.9235             | -0.50966            | 0.007                    | no                 | Bos taurus DLG2 antisense RNA 1 conserved region 1                                                    |
| URS000065971F | 198      | 132      | 1.0106             | 0.38695776          | 0.279                    | no                 | 1.0106             | 0.413437            | 0.281                    | no                 | Bos taurus FTX transcript, XIST regulator conserved region 5                                          |
| URS000065978A | 129      | 6        | 0.3621             | 0.5274011           | 0.032                    | no                 | 0.3621             | 0.478289            | 0.052                    | no                 | Bos taurus Rhabdomyosarcoma 2 associated transcript conserved region 5                                |
| URS00006599B8 | 410      | 63       | 0.463              | -0.2440055          | 0.001                    | no                 | 0.463              | -0.22584            | 0.008                    | no                 | Bos taurus Prostate cancer antigen RNA 3 conserved region 2                                           |
| URS000067674B | 226      | 54       | 0.9351             | -0.209365           | 0.003                    | no                 | 0.9351             | -0.24973            | 0.016                    | no                 | Bos taurus KCNQ1 overlapping transcript 1 conserved region 5                                          |
| URS0000677082 | 362      | 192      | 0.6974             | 0.06993743          | 0.033                    | no                 | 0.6974             | 0.086216            | 0.090                    | no                 | Bos taurus HOXA transcript at the distal tip, conserved region 3                                      |
| URS0000677825 | 110      | 0        | 0                  | 0                   | 0.000                    | no                 | 0                  | 0                   | 0.004                    | no                 | Bos taurus WT1 antisense RNA conserved region 1                                                       |
| URS00006791CF | 71       | 24       | 0.8356             | -0.2796512          | 0.001                    | no                 | 0.8356             | -0.26156            | 0.011                    | no                 | Bos taurus FTX transcript, XIST regulator conserved region 1                                          |
| URS000067BA49 | 69       | 27       | 0.7868             | -0.0096499          | 0.004                    | no                 | 0.7868             | 0.012107            | 0.026                    | no                 | Bos taurus SOX2 overlapping transcript exon 2                                                         |
| URS000067BA92 | 143      | 9        | 0.3728             | -1.3586378          | 0.000                    | no                 | 0.3728             | -1.36827            | 0.000                    | no                 | Bos taurus HOX antisense intergenic RNA myeloid 1 conserved region 5                                  |
| URS000067C9B9 | 110      | 0        | 0                  | 0                   | 0.000                    | no                 | 0                  | 0                   | 0.004                    | no                 | Bos taurus SOX2 overlapping transcript exon 4                                                         |
| URS000067F6F2 | 95       | 36       | 0.7352             | -0.4349202          | 0.000                    | no                 | 0.7352             | -0.48489            | 0.004                    | no                 | Bos taurus Pvt1 oncogene conserved region 3                                                           |
| URS00006863C9 | 465      | 132      | 0.6392             | -0.1553791          | 0.003                    | no                 | 0.6392             | -0.16905            | 0.022                    | no                 | Bos taurus KCNQ1 overlapping transcript 1 conserved region 1                                          |
| URS0000692A75 | 272      | 75       | 1.0068             | -0.3422251          | 0.002                    | no                 | 1.0068             | -0.35497            | 0.015                    | no                 | Bos taurus ST7 overlapping transcript 4 conserved region 3                                            |

| Table S2 continued |     |     |        |            |       |    |        |          |       |    |                                                                             |
|--------------------|-----|-----|--------|------------|-------|----|--------|----------|-------|----|-----------------------------------------------------------------------------|
| URS00006940C3      | 350 | 48  | 1.0193 | 0.22573242 | 0.052 | no | 1.0193 | 0.219188 | 0.095 | no | Bos taurus Six3os1 conserved region 4                                       |
| URS0000696811      | 244 | 75  | 0.8859 | -0.1532851 | 0.004 | no | 0.8859 | -0.1798  | 0.022 | no | Bos taurus MEST intronic transcript 1, antisense RNA conserved region       |
| URS000069B56D      | 77  | 0   | 0      | 0          | 0.000 | no | 0      | 0        | 0.004 | no | Bos taurus MER1 repeat containing imprinted transcript 1 conserved region 1 |
| URS00006B0AAD      | 142 | 126 | 0.5035 | -0.1773767 | 0.002 | no | 0.5035 | -0.22026 | 0.013 | no | Bos taurus Embryonic ventral forebrain-2 long ncRNA                         |
| URS00006B3397      | 139 | 0   | 0      | 0          | 0.000 | no | 0      | 0        | 0.004 | no | Bos taurus T-cell leukemia/lymphoma 6 conserved region 3                    |
| URS00006B4586      | 96  | 57  | 0.8308 | -0.0128911 | 0.007 | no | 0.8308 | -0.00722 | 0.033 | no | Bos taurus FTX transcript, XIST regulator conserved region 2                |
| URS00006B4E0E      | 85  | 0   | 0      | 0          | 0.000 | no | 0      | 0        | 0.004 | no | Bos taurus X-chromosome inactivation gene exon 1                            |
| URS00006B5CAE      | 87  | 84  | 0.9455 | -0.0385016 | 0.011 | no | 0.9455 | -0.00353 | 0.050 | no | Bos taurus Six3os1 conserved region 1                                       |
| URS00006BA2BF      | 113 | 45  | 1.2098 | -0.5166496 | 0.001 | no | 1.2098 | -0.47865 | 0.012 | no | Bos taurus FAM13A antisense RNA 1 conserved region 2                        |
| URS00006BE61D      | 90  | 42  | 0.7436 | -0.1707097 | 0.002 | no | 0.7436 | -0.25714 | 0.010 | no | Bos taurus Deleted in lymphocytic leukemia 2 conserved region 2             |
| URS00006C4A69      | 55  | 24  | 0.9172 | -0.5042849 | 0.000 | no | 0.9172 | -0.53981 | 0.004 | no | Bos taurus Deleted in lymphocytic leukemia 2 conserved region 4             |
| URS00006C6BE4      | 97  | 15  | 0.3752 | -0.5360566 | 0.000 | no | 0.3752 | -0.64961 | 0.001 | no | Bos taurus Maternally expressed 8 exon 1                                    |
| URS00006CA376      | 106 | 48  | 1.2192 | 0.05717137 | 0.033 | no | 1.2192 | 0.020792 | 0.071 | no | Bos taurus Rhabdomyosarcoma 2 associated transcript conserved region 4      |
| URS00006CB17F      | 70  | 6   | 0.4615 | 0.5002443  | 0.036 | no | 0.4615 | 0.45189  | 0.057 | no | Bos taurus H19 conserved region 1                                           |
| URS00006CC536      | 168 | 9   | 0.876  | -1.8762211 | 0.000 | no | 0.876  | -1.53144 | 0.000 | no | Bos taurus FAS antisense RNA 1 conserved region                             |
| URS00006CDA32      | 281 | 30  | 0.4802 | -0.1819694 | 0.001 | no | 0.4802 | -0.22201 | 0.006 | no | Bos taurus Highly up-regulated in liver cancer conserved region             |
| URS00006CF3EB      | 105 | 9   | 0.6632 | -0.9039742 | 0.000 | no | 0.6632 | -0.98346 | 0.000 | no | Bos taurus Maternally expressed 3 conserved region 2                        |
| URS00006D1977      | 127 | 0   | 0      | 0          | 0.000 | no | 0      | 0        | 0.004 | no | Bos taurus Nuclear enriched abundant transcript 1 conserved region 2        |
| URS00006D2BA2      | 108 | 0   | 0      | 0          | 0.000 | no | 0      | 0        | 0.004 | no | Bos taurus Maternally expressed 8 exon 2                                    |
| URS00006D5400      | 231 | 69  | 0.9188 | -0.4056706 | 0.001 | no | 0.9188 | -0.43784 | 0.009 | no | Bos taurus HOXA11 antisense RNA 1 conserved region 4                        |
| URS00006D9004      | 237 | 9   | 0.6218 | -1.8230951 | 0.000 | no | 0.6218 | -1.55709 | 0.000 | no | Bos taurus Hydatidiform mole associated and imprinted conserved region      |
| URS00006DB21C      | 229 | 57  | 0.9927 | -0.1059787 | 0.006 | no | 0.9927 | -0.10886 | 0.031 | no | Bos taurus SOX2 overlapping transcript exon 1                               |
| URS00006DD07E      | 129 | 114 | 1.0023 | -0.0866744 | 0.013 | no | 1.0023 | -0.08125 | 0.052 | no | Bos taurus SMAD5 antisense RNA 1 conserved region 2                         |
| URS00006DEB8C      | 288 | 57  | 1.1384 | -0.2507425 | 0.004 | no | 1.1384 | -0.14768 | 0.036 | no | Bos taurus WT1 antisense RNA conserved region 7                             |
| URS00006E1889      | 103 | 39  | 0.9909 | 0.21341658 | 0.041 | no | 0.9909 | 0.264031 | 0.099 | no | Bos taurus T-cell leukemia/lymphoma 6 conserved region 1                    |
| URS00006E497F      | 91  | 87  | 0.6421 | 0.08119545 | 0.010 | no | 0.6421 | 0.064335 | 0.037 | no | Bos taurus ZNFX1 antisense RNA 1 conserved region 2                         |
| URS00006E59D7      | 144 | 72  | 0.9981 | -0.1669965 | 0.005 | no | 0.9981 | -0.14338 | 0.031 | no | Bos taurus Taurine upregulated gene 1 conserved region 1                    |
| URS00006EA6C7      | 180 | 0   | 0      | 0          | 0.000 | no | 0      | 0        | 0.004 | no | Bos taurus Embryonic ventral forebrain RNA 1 conserved region 1             |
| URS00006EA80E      | 115 | 0   | 0      | 0          | 0.000 | no | 0      | 0        | 0.004 | no | Bos taurus FAM13A antisense RNA 1 conserved region 1                        |
| URS00006EEA29      | 135 | 42  | 1.0223 | -0.1295657 | 0.005 | no | 1.0223 | -0.09857 | 0.031 | no | Bos taurus Myocardial infarction associated transcript exon 1               |
| URS00006F4484      | 68  | 0   | 0      | 0          | 0.000 | no | 0      | 0        | 0.004 | no | Bos taurus Maternally expressed 8 exon 3                                    |
| URS00006F60BE      | 92  | 78  | 1.1896 | -0.0083285 | 0.027 | no | 1.1896 | 0.019669 | 0.082 | no | Bos taurus ZNFX1 antisense RNA 1 conserved region 2                         |
| URS00006F7F53      | 154 | 48  | 1.1266 | -0.0075192 | 0.016 | no | 1.1266 | 0.045069 | 0.065 | no | Bos taurus NPPA antisense RNA 1 conserved region 2                          |
| URS00006FE4FF      | 171 | 75  | 0.779  | -0.3315217 | 0.001 | no | 0.779  | -0.36448 | 0.009 | no | Bos taurus ST7 overlapping transcript 4 conserved region 2                  |
| URS00006FF6E6      | 143 | 99  | 0.8323 | 0.11958267 | 0.026 | no | 0.8323 | 0.150557 | 0.076 | no | Bos taurus Rhabdomyosarcoma 2 associated transcript conserved region 8      |
| URS00006FFF5E      | 262 | 114 | 1.014  | 0.05805101 | 0.035 | no | 1.014  | 0.042241 | 0.081 | no | Bos taurus SMAD5 antisense RNA 1 conserved region 1                         |
| URS00007035F2      | 132 | 18  | 0.408  | -0.0844732 | 0.001 | no | 0.408  | -0.18755 | 0.006 | no | Bos taurus Pvt1 oncogene conserved region 5                                 |
| URS00007036C6      | 141 | 57  | 0.6862 | 0.02145747 | 0.006 | no | 0.6862 | 0.067528 | 0.033 | no | Bos taurus Rhabdomyosarcoma 2 associated transcript conserved region 2      |
| URS0000708ABD      | 586 | 120 | 0.8006 | 0.07255146 | 0.021 | no | 0.8006 | 0.115562 | 0.073 | no | Bos taurus Vax2os1 conserved region 2                                       |

|               |      |     |        |            |       |     |        |          |       |     |                                                                                                                       |
|---------------|------|-----|--------|------------|-------|-----|--------|----------|-------|-----|-----------------------------------------------------------------------------------------------------------------------|
| URS0000717AE7 | 102  | 0   | 0      | 0          | 0.000 | no  | 0      | 0        | 0.004 | no  | Bos taurus ZEB2 antisense RNA 1 conserved region 3                                                                    |
| URS0000717FE0 | 101  | 0   | 0      | 0          | 0.000 | no  | 0      | 0        | 0.004 | no  | Bos taurus ZEB2 antisense RNA 1 conserved region 3                                                                    |
| URS0000719B0F | 77   | 48  | 1.1266 | -0.0075192 | 0.016 | no  | 1.1266 | 0.045069 | 0.065 | no  | Bos taurus NPPA antisense RNA 1 conserved region 2                                                                    |
| URS00007259BA | 104  | 75  | 1.0494 | -0.2156819 | 0.004 | no  | 1.0494 | -0.21204 | 0.027 | no  | Bos taurus Metastasis associated lung adenocarcinoma transcript 1                                                     |
| URS0000726CC0 | 118  | 12  | 1.0582 | -0.380929  | 0.001 | no  | 1.0582 | -0.48892 | 0.007 | no  | Bos taurus GNAS antisense RNA 1 conserved region 2                                                                    |
| URS000072850B | 247  | 45  | 1.1273 | -0.2826858 | 0.003 | no  | 1.1273 | -0.28376 | 0.020 | no  | Bos taurus Prostate androgen-regulated transcript 1 conserved region 2                                                |
| URS000072AE6B | 54   | 27  | 0.867  | -0.7723672 | 0.000 | no  | 0.867  | -0.8099  | 0.002 | no  | Bos taurus FMR1 antisense RNA 1 conserved region 1                                                                    |
| URS000072B940 | 215  | 192 | 1.0975 | 0.05917406 | 0.100 | no  | 1.0975 | 0.060013 | 0.165 | no  | Bos taurus DLG2 antisense RNA 1 conserved region 2                                                                    |
| URS000072CEB9 | 330  | 141 | 0.9852 | -0.0307435 | 0.024 | no  | 0.9852 | -0.01007 | 0.078 | no  | Bos taurus Deleted in lymphocytic leukemia 1 conserved region 2                                                       |
| URS0000759C73 | 2069 | 345 | 0.5704 | 0.12308877 | 0.132 | no  | 0.5704 | 0.166592 | 0.234 | no  | Bos taurus H19, imprinted maternally expressed transcript (non-protein coding) (H19), long non-coding RNA.            |
| URS0000759E04 | 539  | 348 | 1.0681 | 0.42958035 | 0.861 | yes | 1.0681 | 0.408492 | 0.675 | yes | Bos taurus artiodactyl-specific transcript 1 (AST1), long non-coding RNA.                                             |
| URS000075A1EC | 978  | 177 | 0.9069 | 0.16822608 | 0.093 | no  | 0.9069 | 0.171259 | 0.153 | no  | Bos taurus uncharacterized LOC100196901 (LOC100196901), transcript variant 1, long non-coding RNA.                    |
| URS000075A42C | 801  | 282 | 0.6385 | -0.0187509 | 0.039 | no  | 0.6385 | 0.026889 | 0.119 | no  | Bos taurus uncharacterized LOC100847825 (LOC100847825), long non-coding RNA.                                          |
| URS000075B4CA | 1135 | 180 | 0.6608 | -0.0817498 | 0.009 | no  | 0.6608 | -0.08575 | 0.042 | no  | Bos taurus chromosome 23 open reading frame, human C6orf52 (C23H6orf52), transcript variant 1, long non-coding RNA.   |
| URS000075B604 | 1008 | 228 | 0.3596 | -0.2278236 | 0.002 | no  | 0.3596 | -0.26194 | 0.018 | no  | Bos taurus uncharacterized LOC100847946 (LOC100847946), long non-coding RNA.                                          |
| URS000075B9FD | 955  | 144 | 0.6445 | -0.1496252 | 0.004 | no  | 0.6445 | -0.17596 | 0.023 | no  | Bos taurus uncharacterized LOC100848574 (LOC100848574), transcript variant 6, long non-coding RNA.                    |
| URS000075BC30 | 1638 | 381 | 0.7    | 0.06400548 | 0.189 | no  | 0.7    | 0.097322 | 0.286 | no  | Bos taurus uncharacterized LOC100140121 (LOC100140121), long non-coding RNA.                                          |
| URS000075C0CE | 1954 | 555 | 0.7853 | 0.19222819 | 0.821 | yes | 0.7853 | 0.22794  | 0.731 | yes | Bos taurus maternally expressed 3 (non-protein coding) (MEG3), long non-coding RNA.                                   |
| URS000075C544 | 806  | 180 | 0.6608 | -0.0817498 | 0.009 | no  | 0.6608 | -0.08575 | 0.042 | no  | Bos taurus chromosome 23 open reading frame, human C6orf52 (C23H6orf52), transcript variant 3, long non-coding RNA.   |
| URS000075CDC9 | 446  | 78  | 0.8326 | -0.1762391 | 0.003 | no  | 0.8326 | -0.21904 | 0.018 | no  | Bos taurus small nucleolar RNA host gene 4 (non-protein coding) (SNHG4), long non-coding RNA.                         |
| URS000075CF6E | 888  | 165 | 0.6564 | -0.1177284 | 0.006 | no  | 0.6564 | -0.14663 | 0.030 | no  | Bos taurus uncharacterized LOC788201 (LOC788201), long non-coding RNA.                                                |
| URS000075D01A | 1078 | 372 | 0.5896 | 0.07532513 | 0.143 | no  | 0.5896 | 0.099628 | 0.235 | no  | Bos taurus small nucleolar RNA host gene 12 (non-protein coding) (SNHG12), transcript variant 2, long non-coding RNA. |
| URS000075D08D | 546  | 144 | 0.8749 | 0.07291865 | 0.034 | no  | 0.8749 | 0.058342 | 0.081 | no  | Bos taurus uncharacterized LOC100616526 (LOC100616526), transcript variant 3, long non-coding RNA.                    |
| URS000075D922 | 911  | 144 | 0.6445 | -0.1496252 | 0.004 | no  | 0.6445 | -0.17596 | 0.023 | no  | Bos taurus uncharacterized LOC100848574 (LOC100848574), transcript variant 4, long non-coding RNA.                    |
| URS000075DA73 | 3345 | 186 | 0.6977 | 0.2334901  | 0.072 | no  | 0.6977 | 0.296428 | 0.162 | no  | Bos taurus uncharacterized LOC782788 (MGC148318), long non-coding RNA.                                                |
| URS000075DAE4 | 413  | 168 | 0.9531 | 0.16216371 | 0.096 | no  | 0.9531 | 0.159035 | 0.151 | no  | Bos taurus uncharacterized LOC100616098 (LOC100616098), long non-coding RNA.                                          |

| Table S2 continued |      |      |        |            |       |     |        |          |       |     |                                                                                                                       |
|--------------------|------|------|--------|------------|-------|-----|--------|----------|-------|-----|-----------------------------------------------------------------------------------------------------------------------|
| URS000075DCA1      | 3462 | 342  | 0.7099 | 0.08846014 | 0.142 | no  | 0.7099 | 0.070938 | 0.213 | no  | Bos taurus uncharacterized LOC100616526 (LOC100616526), transcript variant 1, long non-coding RNA.                    |
| URS000075E3D6      | 3025 | 1380 | 0.9853 | 0.32875034 | 1.000 | yes | 0.9853 | 0.32318  | 1.000 | yes | Bos taurus PPARG-TSEN2 (PPARG-TSEN2), transcript variant 1, long non-coding RNA.                                      |
| URS000075EAE1      | 1030 | 180  | 0.6608 | -0.0817498 | 0.009 | no  | 0.6608 | -0.08575 | 0.042 | no  | Bos taurus chromosome 23 open reading frame, human C6orf52 (C23H6orf52), transcript variant 2, long non-coding RNA.   |
| URS000075EB28      | 1123 | 372  | 0.5896 | 0.07532513 | 0.143 | no  | 0.5896 | 0.099628 | 0.235 | no  | Bos taurus small nucleolar RNA host gene 12 (non-protein coding) (SNHG12), transcript variant 1, long non-coding RNA. |
| URS000075EC71      | 1875 | 1107 | 0.9629 | 0.40041855 | 1.000 | yes | 0.9629 | 0.410277 | 0.998 | yes | Bos taurus LOC100271850-MEF2B readthrough transcript (LOC100271850-MEF2B), long non-coding RNA.                       |
| URS000075EDB2      | 1014 | 147  | 0.894  | 0.0876376  | 0.040 | no  | 0.894  | 0.048664 | 0.082 | no  | Bos taurus uncharacterized LOC100848574 (LOC100848574), transcript variant 2, long non-coding RNA.                    |
| URS0000623174      | 121  | 72   | 1.0222 | 0.23927818 | 0.073 | no  | 1.0222 | 0.241506 | 0.121 | no  | Bos taurus Nuclear enriched abundant transcript 1 conserved region 1                                                  |
| URS0000625647      | 155  | 42   | 0.6501 | -0.1411949 | 0.001 | no  | 0.6501 | -0.13515 | 0.013 | no  | Bos taurus Pregnancy induced noncoding RNA                                                                            |
| URS0000627F0B      | 157  | 45   | 0.8968 | -0.0799771 | 0.005 | no  | 0.8968 | -0.12273 | 0.023 | no  | Bos taurus TP53 target 1 conserved region 1                                                                           |
| URS0000627F39      | 113  | 6    | 0.3299 | -2.901853  | 0.000 | no  | 0.3299 | -3.08032 | 0.000 | no  | Bos taurus Pvt1 oncogene conserved region 6                                                                           |
| URS000062B719      | 131  | 24   | 0.7015 | -0.1406256 | 0.001 | no  | 0.7015 | -0.11695 | 0.014 | no  | Bos taurus Prostate-specific transcript 1                                                                             |
| URS000062B8A2      | 204  | 24   | 0.4446 | 0.45463191 | 0.031 | no  | 0.4446 | 0.468966 | 0.067 | no  | Bos taurus Maternal intergenic circadian oscillating RNA 1                                                            |
| URS000062CBF8      | 135  | 15   | 1.0095 | 0.08828311 | 0.015 | no  | 1.0095 | 0.066005 | 0.044 | no  | Bos taurus Deleted in lymphocytic leukemia 2 conserved region 6                                                       |
| URS000062EA6D      | 102  | 12   | 0.3194 | -1.5470274 | 0.000 | no  | 0.3194 | -1.53147 | 0.000 | no  | Bos taurus HOX antisense intergenic RNA myeloid 1 conserved region 4                                                  |
| URS000062F99B      | 124  | 51   | 0.7689 | 0.02880937 | 0.007 | no  | 0.7689 | 0.007589 | 0.029 | no  | Bos taurus Pvt1 oncogene conserved region 3                                                                           |
| URS000063B8D5      | 85   | 0    | 0      | 0          | 0.000 | no  | 0      | 0        | 0.004 | no  | Bos taurus X-chromosome inactivation gene exon 1                                                                      |
| URS000063C398      | 76   | 0    | 0      | 0          | 0.000 | no  | 0      | 0        | 0.004 | no  | Bos taurus ZNRD1 antisense RNA 1 conserved region 2                                                                   |
| URS000063DD01      | 129  | 96   | 0.8591 | -0.2202319 | 0.003 | no  | 0.8591 | -0.2425  | 0.020 | no  | Bos taurus CDKN2B antisense RNA 1 conserved region 3                                                                  |
| URS000063E095      | 80   | 75   | 0.9386 | -0.23211   | 0.003 | no  | 0.9386 | -0.23885 | 0.020 | no  | Bos taurus Deleted in lymphocytic leukemia 2 conserved region 5                                                       |
| URS000063F98F      | 146  | 21   | 0.7892 | -0.4194346 | 0.000 | no  | 0.7892 | -0.41721 | 0.005 | no  | Bos taurus Myocardial infarction associated transcript exon 5 conserved region 1                                      |
| URS0000641959      | 179  | 9    | 0.6695 | -1.1386872 | 0.000 | no  | 0.6695 | -1.15941 | 0.000 | no  | Bos taurus Pvt1 oncogene conserved region 4                                                                           |
| URS0000643C57      | 50   | 0    | 0      | 0          | 0.000 | no  | 0      | 0        | 0.004 | no  | Bos taurus H19 conserved region 1                                                                                     |
| URS000064A264      | 176  | 105  | 0.9142 | -0.244312  | 0.003 | no  | 0.9142 | -0.23639 | 0.024 | no  | Bos taurus NPPA antisense RNA 1 conserved region 1                                                                    |
| URS000064D7DB      | 115  | 39   | 0.7422 | -0.4039124 | 0.000 | no  | 0.7422 | -0.36695 | 0.007 | no  | Bos taurus KCNQ1 overlapping transcript 1 conserved region 3                                                          |
| URS0000660D10      | 85   | 0    | 0      | 0          | 0.000 | no  | 0      | 0        | 0.004 | no  | Bos taurus Myocardial infarction associated transcript exon 5 conserved region 2                                      |
| URS0000662396      | 89   | 60   | 1.1772 | -0.651044  | 0.000 | no  | 1.1772 | -0.70488 | 0.005 | no  | Bos taurus Taurine upregulated gene 1 conserved region 2                                                              |
| URS000066403E      | 107  | 69   | 0.5719 | -0.3791522 | 0.000 | no  | 0.5719 | -0.35714 | 0.006 | no  | Bos taurus Polled intersex syndrome regulated transcript 1                                                            |
| URS00006643D0      | 215  | 186  | 0.5145 | 0.08017167 | 0.019 | no  | 0.5145 | 0.097536 | 0.064 | no  | Bos taurus Six3os1 conserved region 2                                                                                 |
| URS0000665133      | 237  | 9    | 0.6218 | -1.8230951 | 0.000 | no  | 0.6218 | -1.55709 | 0.000 | no  | Bos taurus Hydatidiform mole associated and imprinted conserved region                                                |
| URS0000666A1B      | 92   | 78   | 0.9769 | 0.01201435 | 0.016 | no  | 0.9769 | 0.037318 | 0.059 | no  | Bos taurus ZNF1 antisense RNA 1 conserved region 2                                                                    |
| URS00006678DE      | 168  | 9    | 0.876  | -1.8762211 | 0.000 | no  | 0.876  | -1.53144 | 0.000 | no  | Bos taurus FAS antisense RNA 1 conserved region                                                                       |
| URS0000668B27      | 210  | 39   | 0.8128 | -0.3463585 | 0.001 | no  | 0.8128 | -0.4175  | 0.006 | no  | Bos taurus HOXA11 antisense RNA 1 conserved region 5                                                                  |
| URS0000669E60      | 118  | 57   | 0.8845 | -0.3215334 | 0.001 | no  | 0.8845 | -0.38115 | 0.010 | no  | Bos taurus Highly accelerated region 1A/1B                                                                            |
| URS0000669F75      | 150  | 36   | 0.7222 | -0.1034753 | 0.002 | no  | 0.7222 | -0.11845 | 0.015 | no  | Bos taurus Rhabdomyosarcoma 2 associated transcript conserved region 10                                               |

| Table S2 continued |     |     |        |            |       |    |        |          |       |    |                                                                                  |
|--------------------|-----|-----|--------|------------|-------|----|--------|----------|-------|----|----------------------------------------------------------------------------------|
| URS000066A9DA      | 206 | 81  | 0.8972 | -0.3519839 | 0.001 | no | 0.8972 | -0.39404 | 0.011 | no | Bos taurus ST7 overlapping transcript 4 conserved region 4                       |
| URS000066CA78      | 70  | 24  | 0.8507 | -0.5007781 | 0.000 | no | 0.8507 | -0.37277 | 0.007 | no | Bos taurus JPX transcript, XIST activator conserved region 2                     |
| URS000066DB40      | 239 | 66  | 1.2803 | 0.22602503 | 0.132 | no | 1.2803 | 0.221907 | 0.169 | no | Bos taurus Taurine upregulated gene 1 conserved region 3                         |
| URS000066F704      | 277 | 174 | 0.7893 | 0.03494329 | 0.029 | no | 0.7893 | 0.004977 | 0.071 | no | Bos taurus SOX2 overlapping transcript exon 3                                    |
| URS000066F725      | 208 | 63  | 1.2486 | -0.5533622 | 0.001 | no | 1.2486 | -0.56091 | 0.011 | no | Bos taurus Six3os1 conserved region 7                                            |
| URS00006703D9      | 127 | 12  | 0.9238 | -0.5402292 | 0.000 | no | 0.9238 | -0.50023 | 0.005 | no | Bos taurus T-cell leukemia/lymphoma 6 conserved region 2                         |
| URS0000671CC7      | 151 | 60  | 1.0555 | -0.0020796 | 0.015 | no | 1.0555 | 0.017072 | 0.056 | no | Bos taurus FTX transcript, XIST regulator conserved region 3                     |
| URS0000673933      | 177 | 6   | 0.3194 | -3.3444442 | 0.000 | no | 0.3194 | -3.14823 | 0.000 | no | Bos taurus Taurine upregulated gene 1 conserved region 4                         |
| URS000067E11A      | 215 | 72  | 1.104  | 0.12378344 | 0.045 | no | 1.104  | 0.144991 | 0.102 | no | Bos taurus DLG2 antisense RNA 1 conserved region 1                               |
| URS0000680E2C      | 185 | 177 | 1.0005 | 0.12838402 | 0.099 | no | 1.0005 | 0.174034 | 0.182 | no | Bos taurus Pvt1 oncogene conserved region 1                                      |
| URS0000682766      | 223 | 6   | 0.3194 | -3.3444442 | 0.000 | no | 0.3194 | -3.14823 | 0.000 | no | Bos taurus Prostate androgen-regulated transcript 1 conserved region 1           |
| URS00006867A3      | 69  | 24  | 0.8507 | -0.5007781 | 0.000 | no | 0.8507 | -0.37277 | 0.007 | no | Bos taurus JPX transcript, XIST activator conserved region 2                     |
| URS000068C47E      | 123 | 21  | 0.6706 | -0.9344654 | 0.000 | no | 0.6706 | -0.9314  | 0.001 | no | Bos taurus SPRY4-IT1 conserved region 2                                          |
| URS0000691107      | 97  | 15  | 0.3752 | -0.5360566 | 0.000 | no | 0.3752 | -0.64961 | 0.001 | no | Bos taurus Maternally expressed 8 exon 1                                         |
| URS0000693A09      | 374 | 69  | 0.8801 | 0.12245743 | 0.022 | no | 0.8801 | 0.177823 | 0.074 | no | Bos taurus HOXA transcript at the distal tip, conserved region 2                 |
| URS0000696C1D      | 135 | 90  | 0.7435 | -0.0272282 | 0.007 | no | 0.7435 | -0.01036 | 0.035 | no | Bos taurus HOXB13 antisense RNA 1 conserved region 1                             |
| URS0000697ADE      | 122 | 0   | 0      | 0          | 0.000 | no | 0      | 0        | 0.004 | no | Bos taurus WT1 antisense RNA conserved region 4                                  |
| URS000069BEA8      | 98  | 0   | 0      | 0          | 0.000 | no | 0      | 0        | 0.004 | no | Bos taurus Maternally expressed 8 exon 2                                         |
| URS00006A3960      | 201 | 189 | 0.8598 | -0.018075  | 0.030 | no | 0.8598 | -0.01015 | 0.085 | no | Bos taurus DAOA antisense RNA 1 conserved region 2                               |
| URS00006A711E      | 271 | 57  | 0.627  | -0.289817  | 0.001 | no | 0.627  | -0.2342  | 0.010 | no | Bos taurus Six3os1 conserved region 5                                            |
| URS00006A7D6B      | 198 | 0   | 0      | 0          | 0.000 | no | 0      | 0        | 0.004 | no | Bos taurus ST7 overlapping transcript 4 conserved region 1                       |
| URS00006A961C      | 61  | 39  | 1.0075 | 0.13282328 | 0.026 | no | 1.0075 | 0.116644 | 0.062 | no | Bos taurus Rhabdomyosarcoma 2 associated transcript conserved region 1           |
| URS00006AAE04      | 85  | 36  | 0.8983 | 0.35988544 | 0.075 | no | 0.8983 | 0.35483  | 0.112 | no | Bos taurus NPPA antisense RNA 1 conserved region 3                               |
| URS00006AD16C      | 129 | 87  | 0.4435 | -0.0253377 | 0.003 | no | 0.4435 | -0.00984 | 0.019 | no | Bos taurus WT1 antisense RNA conserved region 2                                  |
| URS00006AD459      | 105 | 9   | 0.6632 | -0.9039742 | 0.000 | no | 0.6632 | -0.98346 | 0.000 | no | Bos taurus Maternally expressed 3 conserved region 2                             |
| URS00006AE16B      | 272 | 21  | 0.7803 | -1.0359179 | 0.000 | no | 0.7803 | -0.85649 | 0.001 | no | Bos taurus WT1 antisense RNA conserved region 8                                  |
| URS00006AEB0       | 98  | 0   | 0      | 0          | 0.000 | no | 0      | 0        | 0.004 | no | Bos taurus HOTAIR conserved region 3                                             |
| URS00006B25E5      | 109 | 18  | 0.4709 | -0.3128058 | 0.000 | no | 0.4709 | -0.34822 | 0.004 | no | Bos taurus Rhabdomyosarcoma 2 associated transcript conserved region 3           |
| URS00006B2E3C      | 166 | 84  | 0.7209 | 0.15808265 | 0.020 | no | 0.7209 | 0.129369 | 0.052 | no | Bos taurus HOXA transcript at the distal tip, conserved region 4                 |
| URS00006B6641      | 202 | 84  | 0.8651 | -0.0218437 | 0.010 | no | 0.8651 | -0.04986 | 0.036 | no | Bos taurus Rhabdomyosarcoma 2 associated transcript conserved region 6           |
| URS00006BB24D      | 217 | 138 | 0.9914 | 0.02906229 | 0.035 | no | 0.9914 | 0.011574 | 0.083 | no | Bos taurus HOX antisense intergenic RNA myeloid 1 conserved region 2             |
| URS00006BE6E9      | 113 | 54  | 0.5573 | -0.5017926 | 0.000 | no | 0.5573 | -0.52344 | 0.003 | no | Bos taurus ST7 overlapping transcript 3 conserved region 3                       |
| URS00006C52CB      | 173 | 0   | 0      | 0          | 0.000 | no | 0      | 0        | 0.004 | no | Bos taurus TTC28 antisense RNA 1 conserved region 3                              |
| URS00006C91FB      | 196 | 33  | 0.6767 | 0.20344683 | 0.014 | no | 0.6767 | 0.271954 | 0.055 | no | Bos taurus Vax2os1 conserved region 3                                            |
| URS00006CB091      | 133 | 30  | 0.8607 | -0.0340372 | 0.005 | no | 0.8607 | -0.05183 | 0.025 | no | Bos taurus JPX transcript, XIST activator conserved region 1                     |
| URS00006CCFE8      | 99  | 69  | 1.0945 | 0.11334694 | 0.040 | no | 1.0945 | 0.102862 | 0.086 | no | Bos taurus MEST intronic transcript 1, antisense RNA conserved region            |
| URS00006CF2CE      | 193 | 90  | 1.101  | 0.3749089  | 0.231 | no | 1.101  | 0.311005 | 0.191 | no | Bos taurus Rhabdomyosarcoma 2 associated transcript conserved region 9           |
| URS00006D0C82      | 383 | 18  | 0.9971 | -0.6064877 | 0.000 | no | 0.9971 | -0.46047 | 0.007 | no | Bos taurus Myocardial infarction associated transcript exon 5 conserved region 3 |
| URS00006D2A59      | 83  | 36  | 0.9707 | -0.129272  | 0.004 | no | 0.9707 | -0.1004  | 0.027 | no | Bos taurus NPPA antisense RNA 1 conserved region 3                               |
| URS00006D6D45      | 159 | 120 | 0.7575 | 0.18214124 | 0.038 | no | 0.7575 | 0.191946 | 0.088 | no | Bos taurus Nuclear enriched abundant transcript 1 conserved region 3             |

| Table S2 continued |       |      |        |            |       |     |        |          |       |     |                                                                                                    |
|--------------------|-------|------|--------|------------|-------|-----|--------|----------|-------|-----|----------------------------------------------------------------------------------------------------|
| URS00006D8830      | 56    | 36   | 0.9322 | 0.21146634 | 0.033 | no  | 0.9322 | 0.255745 | 0.085 | no  | Bos taurus HOXA transcript at the distal tip, conserved region 1                                   |
| URS00006DCB57      | 191   | 54   | 0.6521 | -0.3547823 | 0.000 | no  | 0.6521 | -0.35512 | 0.006 | no  | Bos taurus Deleted in lymphocytic leukemia 1 conserved region 1                                    |
| URS00006E0845      | 38    | 0    | 0      | 0          | 0.000 | no  | 0      | 0        | 0.004 | no  | Bos taurus GNAS antisense RNA 1 conserved region 3                                                 |
| URS00006E2E2E      | 92    | 78   | 1.1063 | 0.0950567  | 0.041 | no  | 1.1063 | 0.056084 | 0.079 | no  | Bos taurus ZNFX1 antisense RNA 1 conserved region 2                                                |
| URS00006E4C4E      | 118   | 0    | 0      | 0          | 0.000 | no  | 0      | 0        | 0.004 | no  | Bos taurus ST7 antisense RNA 1 conserved region 1                                                  |
| URS00006E63B7      | 107   | 0    | 0      | 0          | 0.000 | no  | 0      | 0        | 0.004 | no  | Bos taurus Maternally expressed 8 exon 2                                                           |
| URS00006E88AE      | 71    | 51   | 0.6392 | -0.2225712 | 0.001 | no  | 0.6392 | -0.27969 | 0.008 | no  | Bos taurus FTX transcript, XIST regulator conserved region 1                                       |
| URS00006FBAD6      | 179   | 126  | 0.9038 | -0.2132939 | 0.005 | no  | 0.9038 | -0.16021 | 0.036 | no  | Bos taurus HOXA11 antisense RNA 1 conserved region 6                                               |
| URS00006FEDB4      | 112   | 75   | 0.3852 | -0.1964278 | 0.001 | no  | 0.3852 | -0.2353  | 0.007 | no  | Bos taurus Non-protein coding RNA, upstream of F2R/PAR1 conserved region 1                         |
| URS0000703281      | 211   | 39   | 0.9198 | -0.2777535 | 0.001 | no  | 0.9198 | -0.44458 | 0.007 | no  | Bos taurus HOXA11 antisense RNA 1 conserved region 5                                               |
| URS0000703385      | 76    | 6    | 0.3299 | -2.901853  | 0.000 | no  | 0.3299 | -3.08032 | 0.000 | no  | Bos taurus CLRN1 antisense RNA 1 conserved region                                                  |
| URS0000705FA5      | 122   | 18   | 0.8956 | -0.6394999 | 0.000 | no  | 0.8956 | -0.64138 | 0.003 | no  | Bos taurus Deleted in lymphocytic leukemia 2 conserved region 1                                    |
| URS000071003F      | 98    | 63   | 0.8698 | 0.48692793 | 0.186 | no  | 0.8698 | 0.520013 | 0.210 | no  | Bos taurus HOXA11 antisense RNA 1 conserved region 3                                               |
| URS0000710D82      | 223   | 60   | 0.8505 | -0.4381931 | 0.000 | no  | 0.8505 | -0.39521 | 0.009 | no  | Bos taurus Prostate androgen-regulated transcript 1 conserved region 1                             |
| URS00007164B5      | 194   | 54   | 0.7073 | -0.1455383 | 0.002 | no  | 0.7073 | -0.24467 | 0.011 | no  | Bos taurus KCNQ1 overlapping transcript 1 conserved region 2                                       |
| URS0000719068      | 232   | 78   | 0.7878 | -0.1269287 | 0.004 | no  | 0.7878 | -0.11622 | 0.024 | no  | Bos taurus WT1 antisense RNA conserved region 3                                                    |
| URS0000720259      | 105   | 0    | 0      | 0          | 0.000 | no  | 0      | 0        | 0.004 | no  | Bos taurus GNAS antisense RNA 1 conserved region 1                                                 |
| URS000072B58A      | 126   | 0    | 0      | 0          | 0.000 | no  | 0      | 0        | 0.004 | no  | Bos taurus GNAS antisense RNA 1 conserved region 4                                                 |
| URS000072C9A4      | 105   | 9    | 0.6632 | -0.9039742 | 0.000 | no  | 0.6632 | -0.98346 | 0.000 | no  | Bos taurus Maternally expressed 3 conserved region 2                                               |
| URS000072DC14      | 201   | 81   | 0.8558 | -0.0937773 | 0.006 | no  | 0.8558 | -0.11216 | 0.028 | no  | Bos taurus DAOA antisense RNA 1 conserved region 1                                                 |
| URS0000751D1A      | 820   | 324  | 0.8015 | 0.07230413 | 0.161 | no  | 0.8015 | 0.11947  | 0.262 | no  | Bos taurus (cattle) X5                                                                             |
| URS0000759E9B      | 22812 | 567  | 0.48   | -0.058008  | 0.097 | no  | 0.48   | -0.06463 | 0.277 | no  | Bos taurus X (inactive)-specific transcript (XIST), long non-coding RNA.                           |
| URS000075A02E      | 1894  | 306  | 0.6476 | -0.0680364 | 0.035 | no  | 0.6476 | -0.03546 | 0.113 | no  | Bos taurus uncharacterized LOC100848703 (LOC100848703), long non-coding RNA.                       |
| URS000075AAC6      | 930   | 177  | 0.9069 | 0.16822608 | 0.093 | no  | 0.9069 | 0.171259 | 0.153 | no  | Bos taurus uncharacterized LOC100196901 (LOC100196901), transcript variant 2, long non-coding RNA. |
| URS000075AD92      | 751   | 144  | 0.6445 | -0.1496252 | 0.004 | no  | 0.6445 | -0.17596 | 0.023 | no  | Bos taurus uncharacterized LOC100848574 (LOC100848574), transcript variant 7, long non-coding RNA. |
| URS000075B437      | 926   | 177  | 0.9069 | 0.16822608 | 0.093 | no  | 0.9069 | 0.171259 | 0.153 | no  | Bos taurus uncharacterized LOC100196901 (LOC100196901), transcript variant 3, long non-coding RNA. |
| URS000075B61B      | 886   | 144  | 0.6445 | -0.1496252 | 0.004 | no  | 0.6445 | -0.17596 | 0.023 | no  | Bos taurus uncharacterized LOC100848574 (LOC100848574), transcript variant 5, long non-coding RNA. |
| URS000075B744      | 2851  | 2676 | 1.1013 | 0.33495888 | 1.000 | yes | 1.1013 | 0.329076 | 1.000 | yes | Bos taurus PPARG-TSEN2 (PPARG-TSEN2), transcript variant 2, long non-coding RNA.                   |
| URS000075BB85      | 892   | 114  | 0.6841 | 0.02240328 | 0.010 | no  | 0.6841 | 0.042168 | 0.044 | no  | Bos taurus antisense IGF2R RNA noncoding (AIRN), long non-coding RNA.                              |
| URS000075C9BA      | 795   | 111  | 0.9282 | 0.05455613 | 0.025 | no  | 0.9282 | 0.07886  | 0.076 | no  | Bos taurus uncharacterized LOC100616526 (LOC100616526), transcript variant 2, long non-coding RNA. |
| URS000075CB6C      | 1120  | 147  | 0.894  | 0.0876376  | 0.040 | no  | 0.894  | 0.048664 | 0.082 | no  | Bos taurus uncharacterized LOC100848574 (LOC100848574), transcript variant 1, long non-coding RNA. |
| URS000075DFAF      | 777   | 135  | 0.7837 | -0.1091227 | 0.007 | no  | 0.7837 | -0.11944 | 0.035 | no  | Bos taurus small nucleolar RNA host gene 3 (non-protein coding) (SNHG3), long non-coding RNA.      |
| URS00001A8549      | 918   | 543  | 1.1996 | 0.36515742 | 0.980 | yes | 1.1996 | 0.376433 | 0.908 | yes | Bos taurus (cattle) partial PEG11 antisense RNA                                                    |
| URS000061E61B      | 644   | 189  | 0.7462 | -0.1219713 | 0.010 | no  | 0.7462 | -0.14049 | 0.044 | no  | Bos taurus (cattle) noncoding RNA                                                                  |

| Table S2 continued |     |     |        |            |       |     |        |          |       |    |                                                                                                    |
|--------------------|-----|-----|--------|------------|-------|-----|--------|----------|-------|----|----------------------------------------------------------------------------------------------------|
| URS0000626285      | 61  | 6   | 0.3621 | 1.18215914 | 0.712 | yes | 0.3621 | 1.040412 | 0.302 | no | Bos taurus ZEB2 antisense RNA 1 conserved region 2                                                 |
| URS000062C8E7      | 67  | 15  | 0.6556 | 0.07351687 | 0.005 | no  | 0.6556 | 0.056913 | 0.022 | no | Bos grunniens H19 conserved region 2                                                               |
| URS000063BDFC      | 58  | 3   | 0.3299 | 0          | 0.001 | no  | 0.3299 | 0        | 0.009 | no | Ovis aries HOX antisense intergenic RNA myeloid 1 conserved region 3                               |
| URS00006515F5      | 126 | 54  | 0.9473 | 0.13648592 | 0.026 | no  | 0.9473 | 0.149701 | 0.069 | no | Ovis aries X-chromosome inactivation gene exon 4                                                   |
| URS0000667B4F      | 76  | 0   | 0      | 0          | 0.000 | no  | 0      | 0        | 0.004 | no | Ovis aries Deleted in lymphocytic leukemia 2 conserved region 3                                    |
| URS000067C63C      | 125 | 123 | 1.1507 | 0.04518516 | 0.054 | no  | 1.1507 | 0.049557 | 0.113 | no | Bos taurus H19 conserved region 3                                                                  |
| URS000068C069      | 46  | 0   | 0      | 0          | 0.000 | no  | 0      | 0        | 0.004 | no | Ovis aries CDKN2B antisense RNA 1 conserved region 2                                               |
| URS000069115D      | 96  | 48  | 0.8041 | -0.1356044 | 0.003 | no  | 0.8041 | -0.10815 | 0.020 | no | Bos taurus HOXA11 antisense RNA 1 conserved region 1                                               |
| URS000069C46C      | 71  | 33  | 1.0113 | -0.0135459 | 0.009 | no  | 1.0113 | -0.08887 | 0.029 | no | Bos taurus Ghrelin opposite strand RNA conserved region                                            |
| URS00006A38EC      | 125 | 111 | 0.9834 | 0.221769   | 0.087 | no  | 0.9834 | 0.212901 | 0.133 | no | Bos taurus SMAD5 antisense RNA 1 conserved region 3                                                |
| URS00006BA301      | 186 | 24  | 0.7776 | -0.4064206 | 0.000 | no  | 0.7776 | -0.2448  | 0.010 | no | Ovis aries HOXA11 antisense RNA 1 conserved region 2                                               |
| URS00006BB01F      | 140 | 27  | 0.5365 | -0.3212849 | 0.000 | no  | 0.5365 | -0.44433 | 0.003 | no | Ovis aries FTX transcript, XIST regulator conserved region 4                                       |
| URS00006D6533      | 105 | 54  | 1.0745 | 0.32541807 | 0.120 | no  | 1.0745 | 0.334339 | 0.158 | no | Bos taurus ST7 antisense RNA 1 conserved region 2                                                  |
| URS00006DD98B      | 78  | 51  | 0.8067 | -0.8603869 | 0.000 | no  | 0.8067 | -0.83543 | 0.001 | no | Ovis aries ZEB2 antisense RNA 1 conserved region 4                                                 |
| URS00006FC8F0      | 99  | 51  | 0.8301 | -0.1825912 | 0.002 | no  | 0.8301 | -0.20831 | 0.015 | no | Bos taurus MEST intronic transcript 1, antisense RNA conserved region                              |
| URS00006FECED      | 151 | 84  | 0.7746 | -0.0439212 | 0.006 | no  | 0.7746 | -0.06789 | 0.029 | no | Bos taurus Non-coding RNA BC040587                                                                 |
| URS0000709DD8      | 124 | 0   | 0      | 0          | 0.000 | no  | 0      | 0        | 0.004 | no | Bos taurus GNAS antisense RNA 1 conserved region 5                                                 |
| URS000070AAE0      | 109 | 0   | 0      | 0          | 0.000 | no  | 0      | 0        | 0.004 | no | Bos taurus SOX2 overlapping transcript exon 4                                                      |
| URS00007294CE      | 76  | 57  | 0.5418 | -0.2044881 | 0.001 | no  | 0.5418 | -0.15935 | 0.011 | no | Ovis aries ZNRD1 antisense RNA 1 conserved region 2                                                |
| URS000075E02A      | 947 | 84  | 0.5671 | -0.2743852 | 0.001 | no  | 0.5671 | -0.26996 | 0.009 | no | Bos taurus uncharacterized LOC100848574 (LOC100848574), transcript variant 3, long non-coding RNA. |

**Table S3 Sequence conservation of BLV AS1 and Tax sequences**

|                    | AS1                      | AS1 3rd               | AS1 no overlap         | AS1 no overlap 3rd     | Tax                     | Tax 3rd                 |
|--------------------|--------------------------|-----------------------|------------------------|------------------------|-------------------------|-------------------------|
| AS1                | <b>0.01485<br/>(264)</b> | 0.0286                | 0.3265                 | 0.0198                 | 0.2995                  | 0.1298                  |
| AS1 3rd            |                          | <b>0.034<br/>(88)</b> | 0.4859                 | 0.4595                 | 0.0011                  | 0.4105                  |
| AS1 no overlap     |                          |                       | <b>0.0236<br/>(72)</b> | 0.2278                 | 0.0382                  | 0.9165                  |
| AS1 no overlap 3rd |                          |                       |                        | <b>0.0521<br/>(24)</b> | 0.0035                  | 0.1246                  |
| Tax                |                          |                       |                        |                        | <b>0.0106<br/>(930)</b> | 0.0031                  |
| Tax 3rd            |                          |                       |                        |                        |                         | <b>0.0247<br/>(170)</b> |

Sequence conservation of BLV AS1 and Tax sequences using sequence data from 12 bovine and 28 ovine tumors supplemented with six publicly available whole genome BLV sequences from NCBI

AS1: sequence segment corresponding to the putative protein coding sequence of AS1

AS1 3rd: 3rd codon positions of the putative protein coding sequence of AS1

AS1 no overlap: segment corresponding to the putative protein coding sequence of AS1 that does not overlap with R3 or G4

AS1 no overlap 3rd: 3rd codon positions of the putative protein coding sequence of AS1 that does not overlap with R3 or G4

Tax: full length Tax coding sequence, Tax 3rd: 3rd codon positions of the segment of Tax that does not overlap with Rex

Diagonal: nucleotide diversity (= average difference per nucleotide site across all pairs of isolates) for the corresponding sequence segment, and – between brackets – number of corresponding nucleotide positions. Off-diagonal: p-value of the differences between corresponding nucleotide diversities.

## Table S4 Oligos used

BLV genome coordinates correspond to the provirus found in the YR2 cell line (NCBI Accession: KT122858)

### End point PCR oligos

| Name    | Forward 5'-3'        | Reverse 5'-3'        | Region                            |
|---------|----------------------|----------------------|-----------------------------------|
| AS1-S/L | TCCCTTCTGTTTCCACAACG | CAGAGGACCGGAGATAGAGC | BLV:7121-8564                     |
| AS1-L   | CCCCTAAACCCGATTCTGAT | CAGAGGACCGGAGATAGAGC | BLV:6263-8564                     |
| AS2     | CCCAGTCTCTTCTGGTGTCC | CAGAGGACCGGAGATAGAGC | BLV:2782-8564                     |
| ACTB    | GACAATGGTTCTGGCATGTG | TCCTTGATGTCACGCACAAT | chr11:50421140-50422030 (oviAri3) |

### Real Time PCR oligos for use with SYBR green

| Name           | Forward 5'-3'          | Reverse 5'-3'           | Region                           |
|----------------|------------------------|-------------------------|----------------------------------|
| Tax            | GCCTTCAAATGCCCAAAGAAC  | CAACCAACAACACTTGCCATC   | BLV:4818-7267                    |
| Env-Tax-Rex-R3 | TCTTGCTCCCGAGACCTT     | CTAGCCACCGACGATTGTTT    | BLV:262-4712                     |
| AS1            | TCCCTTCTGTTTCCACAACG   | CTTCTGGTGCCGCTAACTC     | BLV:7121-8404                    |
| AS2            | TTTCGAACGGGCACTACAG    | CTTCTGGTGCCGCTAACTC     | BLV:2732-8404                    |
| TBP            | CTTGACCTAAAGACCATTGCAC | CCATCTTCCCAGAGCTGAATATC | chr8:90670093-90671593 (oviAri3) |
| HPRT1          | GACCAGTCAACAGGCGACAT   | CTTGACCAAGGCAAGCAAAG    | chrX:95382926-95389315 (oviAri3) |
| U6             | CTCGCTTCGGCAGCACATATAC | GGAACGCTTCACGAATTTGCGTG | U6 Small nuclear RNA             |
| Tyr-tRNA       | CCTTCGATAGCTCAGTTGGT   | GTCCTTCGAGCCGGAATC      | Tyrosine transfer RNA            |

### PrimeTime qPCR Assays (Integrated DNA Technologies)

| Name      | Forward 5'-3'          | Probe                                              | Reverse 5'-3'           | Region                                |
|-----------|------------------------|----------------------------------------------------|-------------------------|---------------------------------------|
| AS1 cDNA  | TCCCTTCTGTTTCCACAACG   | /56-FAM/AAGCTCTTC/Zen/GGGATCCATTACCTGC/3IABkFQ/    | CTTCTGGTGCCGCTAACTC     | BLV:7121-8404                         |
| AS2 cDNA  | TTTCGAACGGGCACTACAG    | /56-FAM/CCGCCTTCT/Zen/CCCAGTCTCTTCT/3IABkFQ/       | CTTCTGGTGCCGCTAACTC     | BLV:2732-8404                         |
| TAX cDNA  | GCCTTCAAATGCCCAAAGAAC  | /56-FAM/TGATGATCG/Zen/GTTGTGGGCGTCTTC/3IABkFQ/     | CAACCAACAACACTTGCCATC   | BLV:4818-7267                         |
| RPS9 cDNA | TGACGCTGGATGAGAAAGAC   | /56-FAM/CTGTTCGAA/ZEN/GGTAATGCCCTG/3IABkFQ/        | CTTCAGGCCCAGGATGTAATC   | chr14:60,263,509-60,268,300 (oviAri3) |
| TBP cDNA  | CTTGACCTAAAGACCATTGCAC | /56-FAM/TGCCCCGAAA/ZEN/TGCTGAGTATAATCCCAA/3IABkFQ/ | CCATCTTCCCAGAGCTGAATATC | chr8:90670093-90671593 (oviAri3)      |
| BLV DNA   | CTTACAACGCTTCCTCCATGAC | /56-FAM/ACGCTCACC/ZEN/TGGTCAGAATTGGTT/3IABkFQ/     | GGCGGGAGAGCCATTTATTT    | BLV:5806-5916                         |
| RPS9 DNA  | TGGATGTTGGTATTGGGTGG   | /56-FAM/TTCTGGTCT/ZEN/CAGGGAACTTGCTGG/3IABkFQ/     | CCCTGTGCCATCTCTTTGTC    | chr18:63386124-63386267 (BosTau6)     |

## Table S4 continued

### Oligos for Luciferase assays

| Name    | Forward 5'-3'                              | Reverse 5'-3'                         | Region                |
|---------|--------------------------------------------|---------------------------------------|-----------------------|
| 5'LTR   | TGAC <b>GCTAGC</b> TGTATGAAAGATCATGCCGACCT | TGAC <b>AAGCTT</b> ACGAGCCCCCAATTGTTT | BLV:1-544             |
| 3'LTR   | TGAC <b>AAGCTT</b> TGAGGGGGAGTCATTGTATG    | TGAC <b>GCTAGC</b> TGTTTGCCGGTCTCTCCT | BLV:8175-8720         |
| 3'LTRΔ  | TGAC <b>AAGCTT</b> GCTGACCTCACCTGCTGATA    | TGAC <b>GCTAGC</b> TGTTTGCCGGTCTCTCCT | BLV:8342-8720         |
| mut DAS | CCTCTGACCGTCTCCATCAGGACTCTCTCTCTTG         | CAAGAGAGAGAGTCTCTGATGGAGACGGTCAGAGG   | BLV:370-403/8559-8592 |
| mut IRF | GTTTCCTGTCTTACAGTCTGTGTCTCGCGGCCCGC        | GCGGGCCGCGAGACACAGACTGTAAGACAGGAAAC   | BLV:450-484/8639-8673 |

Red bases = restriction recognition site

### Oligos for producing altered pBLV344

| Name     | Forward 5'-3'                          | Reverse 5'-3'                          | Region                                                  | Additional info           |
|----------|----------------------------------------|----------------------------------------|---------------------------------------------------------|---------------------------|
| up_miR   | CCACCCTGGTACTCTTCCAA                   | TGAC <b>ACGCGT</b> GTGAAACATGGGGGTGTCA | BLV:3268-6388                                           | Region upstream of miRs   |
| down_miR | TGAC <b>ACGCGT</b> TAGACCCCTAACGGAGGTT | AAGCAGAAAGAACGCTCGAA                   | BLV:6943--6962 & *chr12:59,152,995-59,153,014 (oviAri3) | Region downstream of miRs |
| amp_lig  | CCACCCTGGTACTCTTCCAA                   | GCGGGAGAGCCATTTATTTT                   | BLV:3268-8168                                           | Amplifies ligated DNA     |
| amp_miR  | TGAC <b>ACGCGT</b> GCACCCTCAGGCTGTGG   | TGAC <b>ACGCGT</b> GAACCCGGGGCCTTG     | BLV:6389-6942                                           | Amplifies miR region      |

Red bases = restriction recognition site, \*pBLV344 contains flanking DNA derived from the host

### Oligos for 5'RACE

| Description                              | Oligo 5'-3'                                                          |
|------------------------------------------|----------------------------------------------------------------------|
| GeneRacer 5' Nested With Nextera Forward | <b>TCGTCGGCAGCGTCAGATGTGTATAAGAGACAG</b> GGGACACTGACATGGACTGAAGGAGTA |
| 5'RACE AS1 + Nextera Reverse             | <b>GTCTCGTGGGCTCGGAGATGTGTATAAGAGACAG</b> GGCTGCCTCTGCATCTTCTA       |
| 5'RACE AS2 + Nextera Reverse             | <b>GTCTCGTGGGCTCGGAGATGTGTATAAGAGACAG</b> CCAGTCTCTTCTGGTGTCC        |

Bold = region corresponding to either the nextera reverse or forward

### Oligos for 3'RACE with GeneRacer oligo

| Description                               | Oligo 5'-3'                                              |
|-------------------------------------------|----------------------------------------------------------|
| GeneRace3                                 | GCTGTCAACGATACGCTACGTAACGGCATGACAGTGT                    |
| PCR1 GeneRacer3                           | GCTGTCAACGATACGCTACGTAACG                                |
| PCR1 BLV LTR (8489-8508)                  | GTGGTTTGCCCTTACCTGACC                                    |
| PCR2 GeneRacer3 nest with Nextera Forward | TCGTCGGCAGCGTCAGATGTGTATAAGAGACAGCGCTACGTAACGGCATGACAGTG |
| PCR2 BLV LTR (8405-8424)                  | AGGGTCTCAGGAGGAGAACG                                     |

Bold = region corresponding to either the nextera reverse or forward

## Table S4 continued

### Oligos for 3'RACE with oligo dT + Nextera

| Description                          | Oligo 5'-3'                                           |
|--------------------------------------|-------------------------------------------------------|
| Oligo dT tailed with Nextera reverse | GTCTCGTGGGCTCGGAGATGTGTATAAGAGACAGTTTTTTTTTTTTTTTTTIV |
| PCR1 BLV LTR (8489-8508)             | GTGGTTTGCCTTACCTGACC                                  |
| PCR1 Nextera reverse                 | <b>GTCTCGTGGGCTCGGAGAT</b>                            |
| PCR2 BLV LTR (8405-8424)             | AGGGTCTCAGGAGGAGAACG                                  |
| PCR2 Nextera reverse                 | <b>GTCTCGTGGGCTCGGAGAT</b>                            |

Bold = region corresponding to either the nextera reverse or forward

### Nextera Based oligos annealed together and ligated to fragmented 3'RACE PCR

| Description     | Oligo 5'-3'                                        |
|-----------------|----------------------------------------------------|
| Nextera Forward | TCGTCGGCAGCGTC <b>CAGATGTGTATAAGAGACAGT</b>        |
| Nextera Reverse | /5Phos/ <b>CTGTCTCTTATACACATCT</b> CCGAGCCCACGAGAC |

Bold = region of complementarity in oligos

### Oligos for 3'RACE with GeneRacer oligo primer adjacent to end of AS1-L

| Description                          | Oligo 5'-3'                                                    |
|--------------------------------------|----------------------------------------------------------------|
| BLV (5393-5412) + Nextera Reverse    | <b>GTCTCGTGGGCTCGGAGATGTGTATAAGAGACAG</b> CTGACAGAGGGAACCCAGTC |
| GeneRacer3 nest with Nextera Forward | TCGTCGGCAGCGTCAGATGTGTATAAGAGACAGCGCTACGTAACGGCATGACAGTG       |

### Oligos for 3'RACE using GeneRacer oligo for MinION sequencing

| Description              | Oligo 5'-3'                                                        |
|--------------------------|--------------------------------------------------------------------|
| GeneRace3                | GCTGTCAACGATACGCTACGTAACGGCATGACAGTGTTTTTTTTTTTTTTTTT              |
| PCR1 GeneRacer3          | GCTGTCAACGATACGCTACGTAACG                                          |
| PCR1 BLV LTR (8489-8508) | GTGGTTTGCCTTACCTGACC                                               |
| PCR2 GeneRacer3          | CGCTACGTAACGGCATGACAGTG                                            |
| PCR2 BLV LTR (8405-8424) | <b>GGTGCTGAAGAAAGTTGTCGGTGTCTTTGTGTTAACCT</b> AGGGTCTCAGGAGGAGAACG |

Bold = MinION barcode 1

## Table S4 continued

### Oligos for modified 5' RACE to detect RNA cleavage

| Description PCR1 oligos   | Oligo 5'-3'               |
|---------------------------|---------------------------|
| GeneRacer 5' Primer       | CGACTGGAGCACGAGGACACTGA   |
| miR1-RACE (BLV:6357-6376) | TCGACCCTGCCCTTGACACC      |
| miR2-RACE (BLV:6454-6473) | CTTGCTGCCAGCGCCGAGTT      |
| miR3-RACE (BLV:6584-6603) | GCCCTCCCGTTGCCTGTGAC      |
| miR4-RACE (BLV:6682-6703) | GGGCGATTTCTTGCAGCTGTGC    |
| miR5-RACE (BLV:6803-6827) | TACGCCCTGTTGCACACCCCTTCTA |

| Description PCR2 oligos                         | Oligo 5'-3'                                                         |
|-------------------------------------------------|---------------------------------------------------------------------|
| GeneRacer 5' Nested Primer with Nextera Forward | <b>TCGTCGGCAGCGTCAGATGTGTATAAGAGACAG</b> GGACACTGACATGGACTGAAGGAGTA |
| miR1-Nest + Nextera Reverse                     | <b>GTCTCGTGGGCTCGGAGATGTGTATAAGAGACAG</b> CCATGTTTCACGCACCCTCA      |
| miR2-Nest + Nextera Reverse                     | <b>GTCTCGTGGGCTCGGAGATGTGTATAAGAGACAG</b> GCCCTACCCTGAGCCTCTCTG     |
| miR3-Nest + Nextera Reverse                     | <b>GTCTCGTGGGCTCGGAGATGTGTATAAGAGACAG</b> CCTCTCTCACTTCTGCTTCACCA   |
| miR4-Nest + Nextera Reverse                     | <b>GTCTCGTGGGCTCGGAGATGTGTATAAGAGACAG</b> GCAGCTGTGCTAAGCGAGAGG     |
| miR5-Nest + Nextera Reverse                     | <b>GTCTCGTGGGCTCGGAGATGTGTATAAGAGACAG</b> ATCTCAGCTCGCACCCCAAG      |

Bold = region corresponding to either the nextera reverse or forward

### Oligos for High-throughput sequencing of BLV integration sites

| Description Oligos annealed to make adapter | Oligo 5'-3'                                                                   |
|---------------------------------------------|-------------------------------------------------------------------------------|
| Linker-Long                                 | TCATGATCAATGGGACGATCAGTCTCGTGGGCTCGGAGATGTGTATAAGAGACAGNNNNNNNNCGCTCTTCCGATCT |
| Linker-Short                                | /5Phos/GATCGGAAGAGCGAAAAAAAAAAAAA                                             |

| Description PCR1 oligos | Oligo 5'-3'              |
|-------------------------|--------------------------|
| Link-PCR1               | TCATGATCAATGGGACGATCAGTC |
| BLV-5'END               | GCAGCTGACGTCTCTGTCTG     |
| BLV-3'END               | AGCTCTATCTCCGGTCCTCT     |

| Description PCR2 oligos | Oligo 5'-3'                                                   |
|-------------------------|---------------------------------------------------------------|
| Link-PCR2               | GTCTCGTGGGCTCGGAGAT                                           |
| BLV-5'END-2             | TCGTCGGCAGCGTCAGATGTGTATAAGAGACAGNNNNNNNNGGCTCCTAGGTCGGCATGAT |
| BLV-3'END-2             | TCGTCGGCAGCGTCAGATGTGTATAAGAGACAGNNNNNNNCTAGCGGCCAGGAGAGACC   |

# Table S4 continued

## Locked nucleic acid antisense oligos for AS transcript knockdown

| Name        | Oligo 5'-3'       | Region                                           |
|-------------|-------------------|--------------------------------------------------|
| BLV_AS_LNA1 | CCAAGTGTGCACAATA  | BLV:6994-7009                                    |
| BLV_AS_LNA2 | TACCTGCTGATAAAAC  | BLV:7215-7217 & 8353-8365 covers AS1 splice site |
| BLV_AS_LNA3 | AGCGTTCTCCTCCTGAG | BLV:8403-8419 Common to AS1 & AS2                |

## **Text S1 Extended materials and methods**

### **Ovine/bovine samples and cell lines**

The primary ovine tumors were part of an existing BLV induced tumor collection maintained at -80°C. They were derived from sheep experientially infected with BLV at the acute stage of the disease, where tumor development had occurred 15 to 48 months post infection. These tumors have been described previously [1, 2]. The bovine samples were part of a tumor collection sourced from Belgium, France, United States and Japan maintained at -80°C and described previously [2]. Tumors samples were B-cell lymphoid masses that develop during natural BLV infection. Consequently, the interval between BLV infection and tumor development is not known.

The asymptomatic sheep samples were obtained from animals infected with the molecular clone pBLV344 following experimental procedures outlined in Willems et al [3] and were approved by the University of Saskatchewan Animal Care Committee, following Canadian Council on Animal Care Guidelines (Protocol #19940212). The animals were housed at the Vaccine and Infectious Disease Organization (VIDO-Intervac; Saskatoon, SK, Canada). Blood was collected in EDTA Vacutainers (BD, NJ, USA) and peripheral blood mononuclear cells (PBMCs) were isolated by layering buffy coat cells on a one-step Percoll gradient [4].

The ovine B-cell tumor cell lines YR2 and L267 were derived from the M395 B-cell leukemia and the T267 B-cell lymphoma respectively. Both cell lines share the same proviral integration site as the primary tumor from which they were derived and do not express viral mRNAs originating in the 5'LTR and have been described previously [5, 6]. L267<sub>LtaxSN</sub> and YR2<sub>LtaxSN</sub> are the products of transduction of the L267 and YR2 cell lines with the pLTaxSn retroviral vector, producing constitutive expression of the viral transactivator Tax and as a consequence constitutive expression of the viral mRNAs [7]. The lymphoid cell suspensions were cultured in OPTIMEM medium (Invitrogen) supplemented with 10% FCS, 1 mM sodium pyruvate, 2 mM glutamine, MEM nonessential amino acids solution 1X (Gibco) and 100 µg/mL kanamycin at a concentration of 10<sup>6</sup> cells/mL. HeLa cells were procured from the American Type Culture Collection (ATCC), while the 293T cells were a gift from F. Kanshanchi (George Mason University, Manassas, VA). HeLa and 293T cells were cultured in DMEM supplemented with 10% FCS, L-glutamine and penicillin/streptomycin.

### **RNA sequencing**

Total RNA was extracted using either TRIzol (Life Technologies) followed by treatment with turbo DNase (Life Technologies) or with Qiagen AllPrep DNA/RNA/microRNA kit. Using 1 µg of RNA, strand specific, ribosomal RNA depleted libraries were prepared with the Illumina TruSeq Total RNA stranded kit. The resultant libraries were assessed on an Agilent Bioanalyzer DNA 1000 and by qPCR with the KAPA kit (KAPA biosystems) followed by sequencing on an Illumina HiSeq 2000 (2 x 100bp paired-end reads), generating approximately 60 million raw paired-end reads per library. Small RNA libraries were prepared using the Illumina TruSeq Small RNA Library Preparation Kit and sequenced on an Illumina NextSeq 500 (75bp single reads). Custom host-provirus reference genome builds were generated using the bovine UMD3.1 [8] or ovine OAR3.1 [9] and the proviral genome sequence for BLV YR2 (NCBI Accession: KT122858) and the resultant RNA reads were mapped to the appropriate genome using STAR

(v2.3.1.u) [10] and BWA [11]. Sorting, indexing and separating of the sense from the antisense was carried out with SAMtools [12] and BAMtools [13]. Read quantification and read count normalization was carried out with FeatureCounts [14] and R packages DESeq2 [15] respectively. Transcript quantification was also assessed with RSEM [16]. The percentage of AS1-S vs AS1-L transcripts observed was calculated by counting the reads aligning to the AS1-L region (5237-6895) and normalized to the region length (1658bp). Reads aligning to the region in common to AS1-S & AS1-L (6895-7217) were normalised to the length (322) followed by subtraction of the reads from the AS1-L. The ratio of AS1-S compared to AS1-L was then computed via:  $AS1.S.norm / (AS1.S.norm + AS1.L.norm)$ . This was computed based on all the ovine and bovine samples as well as the YR2 and L267 cell lines. The Integrative Genomic Viewer (IGV) was used for visualisation of aligned sequences [17]. Reads originating from either of the two BLV LTRs aligned to both the 5' and 3' LTRs due to the identical sequences of both LTRs.

### **End point PCR**

RNA and DNA was extracted using the Qiagen AllPrep DNA/RNA/microRNA kit. Reverse transcription was carried out using SuperScript III Reverse Transcriptase (Life technologies), with subsequent RNase H treatment (New England Biolabs) and primed with random hexamers. Each PCR reaction contained 1ul cDNA, 3pmol forward and reverse primer, 0.1ul dNTPs (10 mM), 0.075ul GoTaq Hot Start Polymerase (Promega), 2ul Q5 buffer and 6.2ul H<sub>2</sub>O. Annealing and extension conditions were based on the manufacturer's recommendations, with a total of 35 cycles used. PCR products were visualized on a 1.5% agarose gel. PCR primers used are listed in Table S4.

### **High-throughput sequencing of BLV integration sites**

To ensure that asymptomatic animals were in a polyclonal stage of infection we carried out high throughput sequencing of proviral integration sites. The method used is similar to that outlined by [18, 19], while incorporating a number of changes to increase sensitivity and facilitate sample multiplexing and is detailed in (Rosewick et al, submitted). Briefly, 5ug of DNA is sheared in a Bioruptor Pico (Diagenode) following the manufacturer's instructions for fragments of ~1000bp. Samples are end repaired and dA tailed with the NEBNext Ultra End Repair/dA-Tailing Module (New England Biolabs) followed by ligation to a linker containing the Nextera Reverse sequence and a upstream sequence to facilitate nested PCR. Nested PCR was carried out with primer matching the linker and the BLV LTRs. Nextera XT indexes (Illumina) were added followed by sequencing on a Illumina MiSeq instrument with 2x75bp reads (Reagent Kit v3) or 2x150bp (Reagent Kit v2). The resultant paired-end reads were aligned to the host-provirus hybrid genome with BWA. Reads were trimmed based on average base quality ( $\geq 30$ ) and paired end reads spanning the LTR-host junction (Read 1: 8 nucleotides mapping to the LTR; Read 2: host alignment with maximum 3 mismatches) were extracted based on soft-clipped sequences and mis-paired reads. Read numbers were determined for each proviral integration site using in-house R and Perl scripts. Clone abundance was calculated as an average for the 3' and 5'LTRs.

### **Proviral load quantification**

DNA was extracted with the AllPrep DNA/RNA/microRNA (Qiagen). Proviral load was quantified using PrimeTime qPCR Assays (Integrated DNA Technologies) targeting the BLV

provirus and RPS9 in the host genome for normalization (Listed in Table S4). Reactions were carried out in a 10ul volume with 50ng of template DNA, 1 X Taq Man Universal PCR Master Mix, No AmpErase UNG (Thermo Scientific) and a 1 X dilution of the appropriate PrimeTime assay mix. Thermocycling conditions were 10 min at 95°C, with 40 cycles at 95°C for 15 sec and 60°C for 1 min. Standard curves were generated using serial dilutions of DNA from the YR2 cell line and proviral load in % PBMCs calculated as  $(\text{Sample Average Quantity}) \times 2 / (\text{Sample RPS9}) \times 100$ . (In the YR2 cell line the chromosome into which the BLV provirus integrated has been duplicated, as a consequence each cell carries two provirus copies.)

### **Identification of 5' and 3' ends with RACE**

Total RNA was extracted from the YR2 cell line with TRIzol (Life Technologies) and treated with turbo DNase (Life Technologies). The GeneRacer Kit (Life Technologies) was used to amplify 5' ends of both BLV antisense transcripts with a modified protocol. The manufacturer's protocol was followed until the point of the 1<sup>st</sup> PCR. At this stage primers tailed with a sequence corresponding to the Nextera forward and reverse were used (adapting the protocol described for the perpetration of 16S Ribosomal RNA Gene Amplicons). The addition of the Nextera sequences to the ends of the PCR products facilitated the addition of Illumina adapters and indexes using Nextera XT primers (Illumina), subsequent pooling and high throughput sequencing. In the modified protocol the initial round of PCR was carried out using 2.5 ul of the appropriate cDNA, 1.25ul (10μM) primer tailed with the Nextera forward or reverse (listed in Table S4), 0.5ul dNTPs (10 mM), 0.25ul Q5 High-Fidelity DNA Polymerase (New England Biolabs), 5ul Q5 buffer and 14.5ul H<sub>2</sub>O. A total of 35 cycles were carried out, extension and annealing times were based on the manufacturer's recommendations. The resultant PCR product was cleaned up using the QIAquick PCR purification kit (Qiagen), Illumina sequencing adapters and indexes were added via PCR using Illumina Nextera XT primers. The reaction was cleaned up with the QIAquick PCR purification kit (Qiagen) and the resultant library concentration was determined with PicoGreen (Invitrogen). Libraries were pooled with additional Nextera based libraries followed by sequenced 2x75bp on a Illumina MiSeq instrument.

For 3' RACE three slightly different approaches were taken. In all cases cDNA was produced from ~1750ng of total RNA using SuperScript III Reverse Transcriptase (Life technologies), with subsequent RNase H treatment (New England Biolabs). The primer used for cDNA priming was either the GeneRacer oligo dT or an oligo dT tailed with the Nextera reverse sequence attached (see Table S4 for oligos). The first approach to 3'RACE is similar to that outlined in Rosewick et al, submitted. Briefly the 1<sup>st</sup> PCR used 5ul of cDNA as template, primers matching the BLV AS exon 1 and the Nextera reverse and Q5 High-Fidelity DNA Polymerase (New England Biolabs). Annealing temperature was 66°C, with a 4 min extension and a total of 25 cycles. Following cleaning with 1.8X AMPure XP beads (Beckman Coulter), a second semi-nested PCR was then carried out using the same primer matching the Nextera reverse and a second primer in the BLV AS exon 1, with the same cycling conditions as above. The resultant PCR product was then sheared in a Bioruptor Pico (Diagenode) following the manufacturer's instructions for fragments of ~400bp. End repair and dA tailing with the NEBNext Ultra End Repair/dA-Tailing Module (New England Biolabs) was followed by cleaning with AMPure XP beads (Beckman Coulter) and ligation to 60pmol annealed oligos corresponding to the Nextera forward and reverse sequences with T4 DNA ligase (Ligase New England Biolabs). The DNA was again cleaned with 0.8X AMPure XP beads and Nextera XT indexes (Illumina) were added

by PCR, the indexed libraries were again cleaned with 0.8X AMPure XP beads and quantified by PicoGreen (Invitrogen). The resultant libraries were mixed with additional Nextera based libraries and sequenced at either 2x75bp (Reagent Kit v3) or 2x150bp (Reagent Kit v2) on a Illumina MiSeq instrument. Reads from both approaches were mapped and visualized in the same manner outlined for the RNA sequencing data.

The second approach to 3'RACE utilized cDNA primed with the GeneRacer oligo dT. In this approach only a single round of PCR was carried out with a primer matching the GeneRacer oligo tailed with the Nextera Forward sequence and a second primer just upstream of the potential poly A site in AS1-L tailed with the Nextera Reverse sequence (see Table S4 for oligos). The PCR used 2.5ul of cDNA, Q5 High-Fidelity DNA Polymerase (New England Biolabs), with an annealing temperature of 67°C and a 45 sec extension and a total of 35 cycles. The reaction was cleaned up with a MiniElute column (Qiagen). Addition of the Nextera XT indexes (Illumina) quantification and sequencing on the Illumina MiSeq instrument was carried out in the same manner as described above.

The final approach to the 3'RACE utilized the MinION's (Oxford Nanopore Technologies) ability to produce long reads to observe nearly full length AS1-L transcripts. Starting with 2.5 ul of cDNA (primed with the GeneRacer oligo dT), a 1<sup>st</sup> PCR was carried out using LongAmp Taq DNA Polymerase (New England Biolabs). Cycling conditions followed the manufacture recommendations with an annealing temperature of 60°C, an extension time of 11 min and 35 cycles. The resultant PCR product was cleaned up twice using 0.8X AMPure XP beads to ensure the removal of small fragments. A nested PCR was then carried out, again following the manufacturer's recommendations for a 50ul reaction with 1ul of the previous PCR as template. Annealing temperature was 60°C, with an extension time of 3 min and 15 cycles. The resultant PCR was divided, with 10ul loaded on a 1% agarose gel stained with SYBR Safe (Thermo Fisher) and the remaining 40 ul loaded on a second 1% agarose, both gels were also loaded with 10kb to 200bp DNA ladder. The gels were run in parallel in the same electrophoresis tank, the stained gel was visualized under UV light and used to determine when the fragments had separated sufficiently. Using this gel as a guide the portion of the unstained gel containing fragments between ~1.5kb and 5kb was excised and purified using the MinElute Gel Extraction Kit (Qiagen). This was done to avoid exposing the DNA fragments to UV light as they will be directly sequenced on the MinION device. Using 1ug of the purified size selected DNA as template a library was prepared following the Amplicon sequencing v11 protocol, with the SQK-MAP-006 Nanopore sequencing kit followed by analysis using the SQK-MAP-006 protocol. FASTA sequences for both the 2D reads (where both strands of the fragment are sequenced) and 1D reads (only one strand sequenced) were extracted with Poretools [20]. The sequences were mapped to the same custom hybrid Ovine/BLV genome described above in the RNA sequencing section using the option for Nanopore reads in BWA [11], followed by processing with SAMtools [12] and visualization in IGV [17].

## **Luciferase assays**

The BLV LTR utilized was derived from the pBLV344 plasmid described previously [3]. The various constructs were cloned into a pGL3 basic luciferase reporter plasmid. Primers used to amplify the LTR from pBLV344 and for site directed mutagens are listed in Table S4. HeLa cells were transfected in triplicate using lipofectamine 2000 (Life technologies) with 400ng of the appropriate construct in addition to 10ng Renilla control plasmid. In cases where the size of

insert differed, the amount of DNA transfected was adjusted to ensure equal copy numbers for each construct. Tax expression constructs used were previously described [6]. Forty-eight hours post transfection the cells were processed using the Dual-Glo Luciferase Assay System (Promega) following the manufacturer's instructions. Statistical significance was assessed by Tukey's multiple comparisons test, carried out using the Prism software (Graphpad), with a p-value < 0.05 considered statistically significant.

### **Protein coding potential and nucleotide diversity**

Coding potential was assessed using the Coding-Potential Assessment Tool (CPAT) [21]. The limited number of annotated bovine lncRNA made the construction of a robust bovine specific model impractical. Instead full length sequence of the BLV antisense transcripts, five protein coding genes from HLTV-1 (including HBZ) and BLV along with 220 bovine and ovine lncRNAs obtained from rncentral.org [22] were collected. These sequences were then analyzed with the CPAT web server [23] using precompiled models based on human and mouse training sets [21].

To determine the sequence conservation of the potential open reading frame in AS1-S/L we examined the region in a number of BLV genomes. BLV consensus sequences were extracted from ovine and bovine aligned RNA-Seq data (STAR) using a samtools mpileup, bcftools and seqtk based custom script. An additional six BLV whole genome sequences were downloaded from NCBI (<http://www.ncbi.nlm.nih.gov/nuccore>) and included in the analysis. Calculation of percentage of identity and significance was completed in the same way as described in Rosewick et al [1].

### **Sub-cellular location of BLV antisense transcripts**

To produce cytoplasmic and nuclear fractions for YR2 we followed the method outlined in Weil et al [24]. Briefly,  $\sim 40 \times 10^6$  cells were washed twice in PBS, 200ul of fractionation buffer (Tris HCl 10mM, NaCl 140mM, MgCl<sub>2</sub> 1.5mM, EDTA 10mM, NP40 0.5%, RNaseOUT 100U/ml) was then added and the cells were incubated on ice for 5 minutes. The resultant lysate was centrifuged for 5 min at 4°C and the supernatant transferred to a new tube (retaining the pellet), followed by centrifugation at full speed for one minute. The supernatant was again transferred to a new tube and 1 ml Trizol added (cytoplasmic fraction). For the pellet, 200ul of fractionation buffer was added and the pellet mixed by pipetting, followed by centrifugation for 5 min at 4°C. Supernatant was discarded and the pellet resuspended in 200ul of fractionation buffer followed by disruption in a TissueLyser II (Qiagen), with the subsequent addition of 1 ml of Trizol (nuclear fraction). RNA was extracted from both fractions and the resultant RNA was then treated with turbo DNase (Life Technologies). RNA from both fractions was sequenced and the reads mapped in the same manner as outlined above. Enrichment in nuclear and cytoplasmic fractions was computed as follows: Paired-end RNA-Seq reads were aligned on the ovine (OAR3.1) with STAR [10]. Read counts for the different RNA species (snRNA, snoRNA, tRNA,...) were computed using featureCounts and ENSEMBL v74 annotation. To account for sequencing depth variation across samples, read count normalization was performed using DESeq2 [15]. Finally, abundance of each RNA species was computed by comparing the total normalized read count of each RNA species.

Real time PCR based absolute quantification (see Table S4 for oligos) was completed on the ABI Prism 7900HT Sequence Detector System (Applied Biosystems) using ABsolute Blue QPCR SYBR Green ROX Mix (Thermo Scientific). PCR products were cloned into a TOPO TA plasmid (Life Technologies) and then diluted to the appropriate concentration to produce a standard curve. Relative enrichment of the transcript was calculated in the same manner as Kobayashi-Ishihara et al [25] % enrichment = RNA level in nucleus / combined RNA levels for nuclear and cytoplasmic fraction  $\times 100$ .

### **Identifying products of RISC mediated cleavage**

RNA was extracted from the YR2 cell line and PBMCs from an asymptomatic sheep (17 months post-inoculation with pBLV344) using Trizol (Life Technologies) and treated with turbo DNase (Life Technologies). In the case of the cytoplasmic and nuclear RNA YR2 cells were fractionated following the method outlined above. The procedure for identifying the products of slicing was based on Davis et al [23]. The RNA Oligo from the gene RACE kit (Promega) was ligated to 3.8ug of total RNA using 1ul 10x Ligase Buffer, 1ul 10mM ATP, 1ul RNaseOut, 1ul T4 RNA ligase in a total volume of 10ul. The mix was incubated for 1hr at 37°C followed by precipitation and resuspension of the RNA in 10ul of H<sub>2</sub>O. Reverse transcription was carried out with Revert Aid Premium Reverse Transcriptase (Thermo Scientific) and random hexamers. PCR was initially carried out in five separate reactions with the common forward Gene Racer 5' primer in combination with a primer designed to identify the slicing of one of the BLV microRNAs. The PCR reaction contained 2ul cDNA, 0.3ul (10  $\mu$ M) forward and reverse primer, 0.1ul dNTPs (10 mM), 0.1ul Q5 High-Fidelity DNA Polymerase (NEB), 2ul Q5 buffer and 5.2ul H<sub>2</sub>O (see Table S4 for oligos). A total of 30 cycles were performed using annealing and extension conditions recommended by the manufacturer. A nested PCR was then carried out using tailed primers carrying the Nextera forward and reverse sequences. The resultant PCR products were pooled and cleaned up with the QIAquick PCR purification kit (Qiagen). As outlined above the Illumina adapters and indexes were added using Nextera XT indexes (Illumina). The resultant libraries were paired-end sequenced 2 x 75bp on an Illumina MiSeq using the Reagent Kit v3. To determine the precise position of the free 5' end of the RNA we took the 30bp sequence of the RNA oligo and concatenated it to a sliding window of 31bp sequences from the BLV microRNA region. Starting at position 6357 a total of 554 61bp hybrid sequences were created. A BASH script was then used to search the FASTA files of each library for perfect matches with the concatenated sequences, thereby identifying the position and frequency of RNA cleavage. The high throughput sequencing reads were also mapped to the ovine-BLV hybrid genome using BWA and visualized in IGV.

### **Deleting and inverting the BLV microRNAs**

The deletion and inversion of BLV microRNAs was carried out on the wild type molecular clone pBLV344 [3]. PCR primers were designed to amplify a 3kb region just upstream of the BLV microRNA cluster and a 1.7 kb region downstream of the microRNAs that included the entire terminal portion of the BLV provirus. The recognition sequence for the MluI restriction enzyme was used to tail the reverse primer of the upstream primer pair and the forward primer of the downstream pair (see Table S4). PCR was completed using Phusion High-Fidelity DNA Polymerase (NEB) with the pBLV344 plasmid as template. PCR products were digested with MluI (NEB) and then ligated together using Promega T4 DNA ligase. The ligation product was

run on a 1% gel and the band of the appropriate size (4.7kb) cut out and purified. The altered BLV fragment was then introduced into the pBLV344 plasmid using the BspEI (NEB) and NheI (Promega) restriction enzymes. This resulted in a provirus lacking the BLV microRNAs with a MluI recognition site incorporated in their place. The inverted plasmid was created by amplifying the BLV microRNA cluster using primers tailed with the MluI recognition site. The resultant PCR product and the pBLV344 plasmid lacking the microRNAs (with MluI site added) were digested with MluI and the PCR product inserted into the provirus by ligation. Sanger sequencing was used to check the orientation of the reinserted region and identify a plasmid where the BLV microRNA orientation was inverted. The resultant constructs were transfected into HeLa cells followed by RNA extraction, using the same protocol outlined above.

### **Antisense knock down with locked nucleic acid antisense oligos (LNAs)**

The BLV cell lines YR2 and L267 are refractory to transfection, consequently it is not possible to knock down the expression of the BLV antisense transcripts using more conventional approaches such as siRNAs. We therefore employed locked nucleic acid antisense oligos (Exiqon), introduced via unassisted uptake [26], following the manufacturer's recommendations. A half million YR2 and L267 cells/well were plated in 24 well plates in a final volume of 500  $\mu$ l. Each cell line was treated in duplicate with a mix of three LNAs that targeted different parts of AS1 (Table S4). Two different final concentrations were tested, 5  $\mu$ M and 10  $\mu$ M. As a negative control both cell lines were treated in duplicate with the LNA longRNA GapmeR Negative control A (Exiqon), at a final concentration of 10  $\mu$ M and a mock treatment using 25  $\mu$ l of H2O was also carried out. Cells were incubated for 5 days and cell numbers were then estimated with a Bio-Rad TC20 Automated Cell Counter. DNA and RNA were extracted using the Qiagen AllPrep DNA/RNA/microRNA kit. cDNA was produced using SuperScript III (Invitrogen) and random hexamers. Real time PCR was carried out using PrimeTime qPCR Assays (Integrated DNA Technologies) and Taq Man Universal PCR Master Mix, No AmpErase UNG (Thermo Scientific) on a ABI 7900HT Fast Real-Time PCR System. Data analysis was carried out with the qbase+ software (Biogazelle), with graphs and statistical analysis carried out using the Prism software (Graphpad). Expression levels for each sample were normalized against RSP9 and TBP levels. To combine the expression levels for both cell lines, expression levels were first scaled to the LNA Negative control of each cell line. P values of  $\leq 0.05$  were considered to be statistically significant after controlling for multiple testing. Statistical significance was assessed via a Kruskal-Wallis test and Dunn's multiple comparisons test, P values of  $\leq 0.05$  were considered to be statistically significant.

### **References for extended materials and methods**

1. Rosewick N, Momont M, Durkin K, Takeda H, Caiment F, Cleuter Y, Vernin C, Mortreux F, Wattel É, Burny A, Georges M, Van den Broeke Anne: **Deep sequencing reveals abundant noncanonical retroviral microRNAs in B-cell leukemia/lymphoma.** *Proceedings of the National Academy of Sciences* 2013, **110**:2306–2311.
2. Kettmann R, Deschamps J, Cleuter Y, Couez D, Burny A, Marbaix G: **Leukemogenesis by bovine leukemia virus: proviral DNA integration and lack of RNA expression of viral long terminal repeat and 3' proximate cellular sequences.** *Proceedings of the National Academy of Sciences* 1982, **79**:2465–2469.

3. Willems L, Kettmann R, Dequiedt F, Portetelle D, Vonèche V, Cornil I, Kerkhofs P, Burny A, Mammerickx M: **In vivo infection of sheep by bovine leukemia virus mutants.** *Journal of Virology* 1993, **67**:4078–4085.
4. Mena A, Nichani AK, Popowych Y, Godson DL, Dent D, Townsend HGG, Mutwiri GK, Hecker R, Babiuk LA, Griebel P: **Innate immune responses induced by CpG oligodeoxyribonucleotide stimulation of ovine blood mononuclear cells.** *Immunology* 2003, **110**:250–257.
5. Kettmann R, Cleuter Y, Gregoire D, Burny A: **Role of the 3' long open reading frame region of bovine leukemia virus in the maintenance of cell transformation.** *Journal of Virology* 1985, **54**:899–901.
6. Merimi M, Klener P, Szynal M, Cleuter Y, Bagnis C, Kerkhofs P, Burny A, Martiat P, Van den Broeke Anne: **Complete suppression of viral gene expression is associated with the onset and progression of lymphoid malignancy: observations in Bovine Leukemia Virus-infected sheep.** *Retrovirology* 2007, **4**:51.
7. Merimi M, Klener P, Szynal M, Cleuter Y, Kerkhofs P, Burny A, Martiat P, Van den Broeke Anne: **Suppression of viral gene expression in bovine leukemia virus-associated B-cell malignancy: interplay of epigenetic modifications leading to chromatin with a repressive histone code.** *Journal of Virology* 2007, **81**:5929–5939.
8. Zimin A, Delcher A, Florea L, Kelley D, Schatz M, Puiu D, Hanrahan F, Pertea G, Van Tassell C, Sonstegard T, Marcais G, Roberts M, Subramanian P, Yorke J, Salzberg S: **A whole-genome assembly of the domestic cow, *Bos taurus*.** *Genome Biol* 2009, **10**:R42–1641.
9. The International Sheep Genomics Consortium, Archibald AL, Cockett NE, Dalrymple BP, Faraut T, Kijas JW, Maddox JF, McEwan JC, Hutton Oddy V, Raadsma HW, Wade C, Wang J, Wang W, Xun X: **The sheep genome reference sequence: a work in progress.** *Animal Genetics* 2010, **41**:449–453.
10. Dobin A, Davis CA, Schlesinger F, Drenkow J, Zaleski C, Jha S, Batut P, Chaisson M, Gingeras TR: **STAR: ultrafast universal RNA-seq aligner.** *Bioinformatics* 2012, **29**:15–21.
11. Li H: **Aligning sequence reads, clone sequences and assembly contigs with BWA-MEM.** *arXiv preprint arXiv:13033997* 2013.
12. Li H, Handsaker B, Wysoker A, Fennell T, Ruan J, Homer N, Marth G, Abecasis G, Durbin R, 1000 Genome Project Data Processing Subgroup: **The Sequence Alignment/Map format and SAMtools.** *Bioinformatics* 2009, **25**:2078–2079.
13. Barnett DW, Garrison EK, Quinlan AR, Stromberg MP, Marth GT: **BamTools: a C++ API and toolkit for analyzing and managing BAM files.** *Bioinformatics* 2011, **27**:1691–1692.
14. Liao Y, Smyth GK, Shi W: **featureCounts: an efficient general purpose program for assigning sequence reads to genomic features.** *Bioinformatics* 2014, **30**:923–930.

15. Love MI, Huber W, Anders S: **Moderated estimation of fold change and dispersion for RNA-seq data with DESeq2.** *Genome Biol* 2014, **15**:550–21.
16. **RSEM: accurate transcript quantification from RNA-Seq data with or without a reference.** 2011:1–16.
17. Thorvaldsdóttir H, Robinson JT, Mesirov JP: **Integrative Genomics Viewer (IGV): high-performance genomics data visualization and exploration.** *Briefings in Bioinformatics* 2013, **14**:178–192.
18. Gillet NA, Gutiérrez G, Rodríguez SM, de Brogniez A, Renotte N, Alvarez I, Trono K, Willems L: **Massive Depletion of Bovine Leukemia Virus Proviral Clones Located in Genomic Transcriptionally Active Sites during Primary Infection.** *PLoS Pathog* 2013, **9**:e1003687.
19. Gillet NA, Malani N, Melamed A, Gormley N, Carter R, Bentley D, Berry C, Bushman FD, Taylor GP, Bangham CRM: **The host genomic environment of the provirus determines the abundance of HTLV-1-infected T-cell clones.** *Blood* 2011, **117**:3113–3122.
20. Loman NJ, Quinlan AR: **Poretools: a toolkit for analyzing nanopore sequence data.** *Bioinformatics* 2014, **30**:3399–3401.
21. Wang L, Park HJ, Dasari S, Wang S, Kocher JP, Li W: **CPAT: Coding-Potential Assessment Tool using an alignment-free logistic regression model.** *Nucleic Acids Research* 2013, **41**:e74–e74.
22. The RNAcentral Consortium: **RNAcentral: an international database of ncRNA sequences.** *Nucleic Acids Research* 2015, **43**:D123–D129.
23. Davis E, Caiment F, Tordoir X, Cavaillé J, Ferguson-Smith A, Cockett N, Georges M, Charlier C: **RNAi-Mediated Allelic trans-Interaction at the Imprinted Rtl1/Peg11 Locus.** *Current Biology* 2005, **15**:743–749.
24. Weil D, Boutain S, Audibert A, Dautry F: **Mature mRNAs accumulated in the nucleus are neither the molecules in transit to the cytoplasm nor constitute a stockpile for gene expression.** *RNA* 2000, **6**:962–975.
25. Kobayashi-Ishihara M, Yamagishi M, Hara T, Matsuda Y, Takahashi R, Miyake A, Nakano K, Yamochi T, Ishida T, Watanabe T: **HIV-1-encoded antisense RNA suppresses viral replication for a prolonged period.** *Retrovirology* 2012, **9**:38.
26. Stein CA, Hansen JB, Lai J, Wu S, Voskresenskiy A, Høg A, Worm J, Hedtjörn M, Souleimanian N, Miller P, Soifer HS, Castanotto D, Benimetskaya L, Ørum H, Koch T: **Efficient gene silencing by delivery of locked nucleic acid antisense oligonucleotides, unassisted by transfection reagents.** *Nucleic Acids Research* 2010, **38**:e3–e3.
